# Supplementary material for: Correlates of Voter Turnout
Source: Springer Nature journal article supplement (doi:10.1007/s11109-021-09720-y), 2021-05-20
Supplement: MOESM1 [file 19182684]

**Correlates of Voter Turnout**  
**ONLINE APPENDIX**

Richard W. Frank  
*Australian National University*

Ferran Martínez i Coma  
*Griffith University*

**TABLE OF CONTENTS**

| <b>Item</b>                                                                                        | <b>Page</b> |
|----------------------------------------------------------------------------------------------------|-------------|
| Articles included in this study                                                                    | 1           |
| Table A1. Turnout studies not included                                                             | 3           |
| Table A2a. Socioeconomic factors, summary statistics, democracies with election turnout data       | 21          |
| Table A2b. Socioeconomic factors, summary statistics, all countries                                | 22          |
| Table A3a. Institutional factors, summary statistics, democracies with election turnout data       | 23          |
| Table A3b. Institutional factors, summary statistics, all countries                                | 24          |
| Table A4a. Political factors, summary statistics, democracies with election turnout data           | 25          |
| Table A4b. Political factors, summary statistics, all countries                                    | 26          |
| Table A5. Election sample—579 elections in 80 countries, 1945-2014                                 | 27          |
| Table A6. Series of models run                                                                     | 30          |
| Table A7. Registered voters w/ fixed effects and lagged DV—complete results                        | 31          |
| Table A8. Registered voters w/ random effects and lagged DV—complete results                       | 32          |
| Table A9. Registered voters w/ fixed effects without lagged DV—complete results                    | 34          |
| Table A10. Registered voters w/ random effects without lagged DV—complete results                  | 35          |
| Table A11. Registered voters w/ robust standard errors and lagged DV—complete results              | 37          |
| Table A12. Registered voters w/ robust standard errors w/out lagged DV—complete results            | 39          |
| Table A13. Voting aged pop. w/ robust standard errors and lagged DV—complete results               | 41          |
| Table A14. Registered voters w/ robust std. errors and no lagged DV in all states—complete results | 43          |
| Table A15. Variables in 9,775 models with compulsory voting                                        | 45          |
| Table A16. Extreme bounds analysis results, samples either above or below median income            | 47          |
| Table A17. Extreme bounds analysis results, samples Western or non-Western states                  | 48          |
| Table A18. Extreme bounds analysis results, samples either in old or new democracies               | 49          |
| Table A19. Extreme bounds analysis—comparing temporal results                                      | 50          |
| Table A20. Comparing results across levels of economic development                                 | 51          |
| Table A21. Comparing results across Western and non-Western states                                 | 52          |
| Table A22. Comparing results across established and new democracies                                | 53          |

### Articles included in this study

- Anderson, Christopher J., and Pablo Beramendi. 2012. "Left Parties, Poor Voters, and Electoral Participation in Advanced Industrial Societies." *Comparative Political Studies* 45(6): 714-746.
- Baek, Mijeon, 2009. "A Comparative Analysis of Political Communication Systems and Voter Turnout." *American Journal of Political Science* 53(2): 376-393.
- Blais, Andre, and Agnieszka Dobrzynska. 1998. "Turnout in Electoral Democracies." *European Journal of Political Research* 33(2): 239-261.
- Blais, Andre and Agnieszka Dobrzynska. 2009. "Turnout in Electoral Democracies Revisited." in *Activating the Citizen: Dilemmas of Political Participation in Europe and Canada*. Eds., J. DeBardeleben, J. Pammett. New York: Palgrave: 63-82.
- Blais, Andre, Eva Anduiza, and Aina Gallego. 2011. "Decentralization and Voter Turnout." *Environmental and Planning C: Politics and Space* 29: 297-320.
- Blais, Andre, and Roland K. Carty. 1990. "Does Proportional Representation Foster Voter Turnout?" *European Journal of Political Research* 18(2): 167-181.
- Colomer, Josep M. 1991. "Benefits and Costs of Voting." *Electoral Studies* 10(4): 313-326.
- Crepaz, Markus M.L., 1990. "The Impact of Voter Polarisation and Postmaterialism on Voter Turnout." *European Journal of Political Research* 18(2): 183-205.
- Endersby, James, and Jonathan Kriekhaus. 2008. "Turnout Around the Globe: The Influence of Electoral Institutions on National Voter Participation, 1972–2000." *Electoral Studies* 27(8): 601–610.
- Elgie, Robert, and Christine Fauvelle-Aymar. 2012. "Turnout under Semi-Presidentialism: First and Second Order National Elections to National-Level Institutions." *Comparative Political Studies* 45(12): 1,598–1,623.
- Fornos, Carolina, Timothy Power, and James C. Garand. 2004. "Explaining Voter Turnout in Latin America, 1980 to 2000." *Comparative Political Studies* 37(8): 909-940.
- Fumagalli, Eileen, and Gaia Narciso. 2012. "Political Institutions, Voter Turnout, and Policy Outcomes." *European Journal of Political Economy* 28(2): 162-173.
- Gallego, Aina, Guillem Rico, and Eva Anduiza. 2012. "Disproportionality and Voter Turnout in New and Old Democracies." *Electoral Studies* 31(1): 159–169.
- Jackman, Robert W. 1987. "Political Institutions and Voter Turnout in the Industrialized Democracies." *American Political Science Review* 81(2): 405–424.
- Jackman, Robert W., and Ross A. Miller. 1995. "Voter Turnout in the Industrial Democracies during the 1980s." *Comparative Political Studies* 27(4): 467-492.
- Kaempfer, William H., and Anton D. Lowenberg. 1993. "A Threshold Model of Electoral Policy and Voter Turnout." *Rationality and Society* 5(1):107-126.
- Kostadinova, Tatiana. 2003. "Voter Turnout Dynamics in post-Communist Europe." *European Journal of Political Research* 42(6): 741-759.
- Kostadinova, Tatiana and Timothy J. Power. 2007. "Does Democratization Depress Participation." *Political Research Quarterly* 60(3): 363–376.
- Kuenzi, Michelle, and Gina M. Lambright. 2007. "Voter Turnout in Africa's Multiparty Regimes." *Comparative Political Studies* 40(6): 665-690.
- Lago, Ignacio, Sandra Bermúdez, Marc Guinjoan and Pablo Simon. 2017. "Turnout and Fractionalization." *Politics* 1-20.
- Lister, Michael. 2007. "Institutions, Inequality and Social Norms: Explaining Variations in Participation." *British Journal of Politics and International Relations* 9(1): 20–35.
- Marshall, John, and Stephen D Fisher. 2015. "Compensation or Constraint? How Different Dimensions of Economic Globalization Affect Government Spending and Electoral Turnout." *British Journal of Political Science* 45(2): 353-89.

- Martínez i Coma, Ferran. 2016. "Turnout Determinants in Democracies and in Non-Democracies." *Electoral Studies* 41: 50-59.
- Martínez i Coma, Ferran, and Minh Trinh. 2017. "How Electoral Integrity Affects Voter Turnout in Democracies." *Australian Journal of Political Science* 52(1): 53-74.
- Pacek, Alexander C., Grigori Pop-Eleches, and Joshua A. Tucker. 2009. "Disenchanted or Discerning: Voter Turnout in Post-Communist Countries" *Journal of Politics* 71(2): 473-491.
- Perez-Linan, Anibal. 2001. "Neo-Institutional Accounts of Voter Turnout: Moving Beyond Industrial Democracies" *Electoral Studies* 20: 281-297.
- Powell, Bingham G. 1986. "American Voter Turnout in Comparative Perspective." *American Political Science Review* 80(1): 17-40.
- Radcliff, Benjamin 1992. "The Welfare State, Turnout and the Economy: A Comparative Analysis." *American Political Science Review* 86(2): 444-454.
- Radcliff, Benjamin. 1996. "Turnout and the Economy: A Comment on Jackman and Miller's "Voter Turnout in the Industrial Democracies in the 1980s." *Comparative Political Studies* 29(6): 718-723.
- Radcliff, Benjamin, and Patricia Davis. 2000. "Labor Organization and Electoral Participation in Industrial Democracies." *American Journal of Political Science* 44(1): 132-141.
- Robbins, Joseph, Lance Hunter, and Gregg R. Murray. 2013. "Voters versus Terrorists: Analyzing the Effect of Terrorist Events on Voter Turnout." *Journal of Peace Research* 50(4): 495–508.
- Robbins, Joseph, and Lance Hunter. 2011. "Impact of Electoral Volatility and Party Replacement on Voter Turnout Levels." *Party Politics* 18(6): 919-939.
- Siaroff, Alan, John W.A. Merer. 2002. "Parliamentary Election Turnout in Europe since 1990." *Political Studies* 50: 916-927.
- Steiner, Nils D. 2010. "Economic Globalization and Voter Turnout in Established Democracies." *Electoral Studies* 29(3): 444-459.
- Steiner, Nils D., and Christian W. Martin. 2012. "Economic Integration, Party Polarisation and Electoral Turnout." *West European Politics* 35(2): 238-265.
- Stockemer, Daniel, and Patricia Calca. 2012. "Presidentialism and Voter Turnout in Legislative Elections" *Parliamentary Affairs* 67: 561-583.
- Stockemer, Daniel, and Lyle Scruggs. 2012. "Income Inequality, Development and Electoral Turnout: New Evidence on a Burgeoning Debate" *Electoral Studies* 31(4): 764–773.
- Stockemer, Daniel, Bernardette LaMontagne, and Lyle Scruggs. 2013. "Bribes and Ballots: The Impact of Corruption on Voter Turnout in Democracies." *International Political Science Review* 34(1): 74-90.
- Stockemer, Daniel, and Susan Khazaeli. 2014. "Electoral Turnout in Muslim-majority States: A Macro-level Panel Analysis." *Politics and Religion* 7: 79-99.
- Stockemer, Daniel. 2015. "District Magnitude and Electoral Turnout: A Macro-Level Global Analysis." *Acta Politica* 50(1): 82-100.
- Tavits, Margit. 2008. "Direct Presidential Elections and Turnout in Parliamentary Contests." *Political Research Quarterly* 62(1): 42-54.
- Tillman, Erik R. 2015. "Pre-electoral Coalitions and Voter Turnout." *Party Politics* 21(5): 726-737.

**Table A1. Turnout studies not included**

| #  | Article                                                                                                                                                                                                                                                                                  | Source | Reason for exclusion                               |
|----|------------------------------------------------------------------------------------------------------------------------------------------------------------------------------------------------------------------------------------------------------------------------------------------|--------|----------------------------------------------------|
| 1  | Aarts, K. & Wessels, B. 2005. "Electoral Turnout." in J.J.A. Thomassen (ed.), <i>The European Voter: A Comparative Study of Modern Democracies</i> . Oxford: Oxford University Press.                                                                                                    | S      | Book chapter; individual level.                    |
| 2  | Aguiar-Conraria, L. & P.C. Magalhães. 2009. "Referendum Design, Quorum Rules and Turnout." <i>Public Choice</i> 144: 63-81.                                                                                                                                                              | CG, S  | On quorum requirements                             |
| 3  | Ahmadov, A.K. 2014. "Oil, Democracy, and Context: A Meta-Analysis." <i>Comparative Political Studies</i> 47(1): 238-67.                                                                                                                                                                  | CG     | Meta-analysis                                      |
| 4  | Aidt, T. S. & Eterovic, D. S. 2011. "Political Competition, Electoral Participation and Public Finance in 20th Century Latin America." <i>European Journal of Political Economy</i> 27(1): 181-200.                                                                                      | S      | Turnout an independent var.                        |
| 5  | Alford, R.R. & E.C. Lee. 1968. "Voting Turnout in American Cities." <i>American Political Science Review</i> 62(3): 796-813.                                                                                                                                                             | G      | 282 US cities in 1962                              |
| 6  | Allers, M.A., 2000. "Het Relatieve Belang Van de Eigen Belastinginkomsten en de Opkomst Bij Gemeenteraadsverkiezingen." In: Allers, M.A. (Ed.), <i>Het Decentrale Belastinggebied, de Kwaliteit van de Lokale Afweging en de Politieke Participatie</i> . COELO, RUGroningen, Groningen. | G      | Dutch language                                     |
| 7  | Althaus, S.L. & Trautman, T.C., 2008. "The Impact of Television Market Size on Voter Turnout in American Elections." <i>American Politics Research</i> 36: 824-56.                                                                                                                       | CG     | County level US 1986-1990, local television market |
| 8  | Altman, D., 2013. "Does an Active Use of Mechanisms of Direct Democracy Impact Electoral Participation? Evidence from the U.S. States and the Swiss cantons." <i>Local Government Studies</i> 39: 739-55.                                                                                | CG     | US & Swiss evidence                                |
| 9  | Andersen, J.J., Fiva, J.H., Natvik, G.J., 2014. "Voting When the Stakes are High." <i>Journal of Public Economics</i> 110: 157-66.                                                                                                                                                       | CG     | Norway 2007 local/regional elections               |
| 10 | Anduiza, P.E. 2002. "Individual Characteristics, Institutional Incentives and Electoral Abstention in Western Europe." <i>European Journal of Political Research</i> 41(3): 643-73.                                                                                                      | S      | Focus on abstention                                |
| 11 | Ansolabehere, S. & Konisky, D. 2006. "The Introduction of Voter Registration and Its Effect on Turnout." <i>Political Analysis</i> 14(1): 83-100.                                                                                                                                        | CG, S  | Impact of registration on turnout US focus         |
| 12 | Ansolabehere, S., Iyengar, S., Simon, A., Valentino, N. 1994. "Does Attack Advertising Demobilise the Electorate?" <i>American Political Science Review</i> 88(4): 829-838.                                                                                                              | G      | US focused, Senate elections                       |
| 13 | Antoni Gorecki, M. 2009. "Uncertainty Is (Usually) Motivating: Election Closeness and Voter Turnout in 2002 and 2006 City President Elections in Poland." <i>Polish Sociological Review</i> 166: 297-308.                                                                                | S      | Poland focus                                       |
| 14 | Ashworth, J., Geys, B., Heyndels, B. 2004. "Everyone Likes a Winner: An Empirical Test of the Effect of Electoral Closeness on Turnout in a Context of Expressive Voting." Paper presented at the Annual EPCS-Conference, Berlin, Germany, April 2004.                                   | G      | Belgian municipal elections                        |

|    |                                                                                                                                                                                                                  |       |                                             |
|----|------------------------------------------------------------------------------------------------------------------------------------------------------------------------------------------------------------------|-------|---------------------------------------------|
| 15 | Baekgaard, M., Jensen, C., Mortensen, P.B., Serritzlew, S., 2014. "Local News Media and Voter Turnout." <i>Local Government Studies</i> 40: 518-32.                                                              | CG    | Danish city council races                   |
| 16 | Bardhan, P. & Mookherjee, D., 2000. "Capture and Governance at Local and National Levels." <i>American Economics Review</i> 90: 135-9.                                                                           | CG    | A model of two-party electoral competition  |
| 17 | Barone, G. & Blasio, G. D. 2013. "Electoral Rules and Voter Turnout." <i>International Review of Law and Economics</i> 36: 25-35.                                                                                | S     | Italy focus                                 |
| 18 | Barreto, M.A., 2007. "Sí Se Puede! Latino Candidates and the Mobilization of Latino Voters." <i>American Political Science Review</i> 101: 425-41.                                                               | CG    | US cities                                   |
| 19 | Barwig, A., 2009. "How Electoral Rules Matter: Voter Turnout in Morocco's 2007 Parliamentary Elections." <i>Journal of North African Studies</i> 14: 289-307.                                                    | CG    | Morocco focus and is not a democracy        |
| 20 | Barzel, Y., Silberberg, E., 1973. "Is the Act of Voting Rational?" <i>Public Choice</i> 16: 51-8.                                                                                                                | G     | US focus                                    |
| 21 | Baybeck, B., 2014. "Local Political Participation." In Haider-Markel, D.P. (Ed.) <i>The Oxford Handbook of State and Local Government</i> . Oxford: Oxford University Press: 95-109.                             | CG    | Local political participation; book chapter |
| 22 | Belletini, G., Ceroni, B., Carlotta, Monfardini, C. 2014. <i>Socio-economic Heterogeneity and Electoral Turnout: An Aggregate Analysis with Precinct-level Data</i> . Rochester: Social Science Research Network | CG    | Local level for Italy                       |
| 23 | Ben-Bassat, A., Dahan, M. 2012. "Social Identity and Voting Behavior." <i>Public Choice</i> 151: 193-214.                                                                                                        | CG    | Local elections                             |
| 24 | Benito B. & Bastida, F. 2009. "Budget Transparency, Fiscal Performance, and Political Turnout: An International Approach." <i>Public Administration Review</i> 69(3): 403-17.                                    | S     | Not solid analysis                          |
| 25 | Berdiev, A.N., Chang, C.-P. 2013. "Explaining Voter Turnout in Taiwan Legislative Elections." <i>International Economic Journal</i> 27: 645-61.                                                                  | CG, S | Single case                                 |
| 26 | Berry, C.R. & Howell, W.G. 2007. "Accountability and Local Elections: Rethinking Retrospective Voting." <i>Journal of Politics</i> 69(3): 844-58.                                                                | CG    | Not appropriate                             |
| 27 | Best, S. J. & Krueger, B. S. 2011. "Government Monitoring and Political Participation in the United States: The Distinct Roles of Anger and Anxiety." <i>American Politics Research</i> 39(1): 85-117.           | S     | US focus                                    |
| 28 | Birch, S. 2010. "Perceptions of Electoral Fairness and Voter Turnout." <i>Comparative Political Studies</i> 43(12): 1,601-22.                                                                                    | S     | Individual level                            |
| 29 | Blais, A. 2006. "What Affects Voter Turnout?" <i>Annual Review of Political Science</i> 9(1): 111-25.                                                                                                            | CG, S | A review                                    |
| 30 | Blais, A. & Rubenson, D. 2013. "The Source of Turnout Decline: New Values or New Contexts?" <i>Comparative Political Studies</i> 46(1): 95-117.                                                                  | S     | Individual focus                            |
| 31 | Blais, A., 2000. <i>To Vote or Not to Vote? The Merits and Limits of Rational Choice Theory</i> . Pittsburgh: University of Pittsburgh Press.                                                                    | CG, G | Book                                        |
| 32 | Blais, A., Aarts, K. 2006. "Electoral Systems and Turnout." <i>Acta Politica</i> 41: 180-96.                                                                                                                     | CG    | A discussion                                |
| 33 | Blank, R.H. 1974. "Socio-economic Determinism of Voting Turnout: A Challenge." <i>Journal of Politics</i> 36: 731-52.                                                                                            | CG, G | US focus                                    |

|    |                                                                                                                                                                                                                      |       |                                                       |
|----|----------------------------------------------------------------------------------------------------------------------------------------------------------------------------------------------------------------------|-------|-------------------------------------------------------|
| 34 | Bonoldi, A., Dalle Nogare, C., Potrafke, N. 2016. <i>Voter Turnout and Inheritance Rules: Evidence from an Alpine Region</i> . Mimeo.                                                                                | CG    | 116 South Tyrolean municipalities                     |
| 35 | Bordignon, M., Nannicini, T., Tabellini, G.E. 2013. “Moderating Political Extremism Single Round vs Runoff Elections under Plurality Rule.” IZA Discussion Paper, No. 7561.                                          | CG    | Not related                                           |
| 36 | Boulding, C. and Brown, D.S. 2015. “Do Political Parties Matter for Turnout: Number of Parties, Electoral Rules and Local Elections in Brazil and Bolivia.” <i>Party Politics</i> 21(3): 404–16.                     | CG, S | Municipal level in Bolivia and Brazil                 |
| 37 | Boulding, C., Brown, D.S., 2014. “Political Competition and Local Social Spending: Evidence from Brazil.” <i>Studies in Comparative International Development</i> 49: 197-216.                                       | CG    | 5000 municipalities in Brazil for 1996, 2000 and 2004 |
| 38 | Boulding, C.E. 2010. “NGOs and Political Participation in Weak Democracies: Subnational Evidence on Protest and Voter Turnout from Bolivia.” <i>Journal of Politics</i> 72(2): 456–68.                               | S     | Local level data in Bolivia                           |
| 39 | Boulianne, S. 2009. “Does Internet Use Affect Engagement? A Meta-analysis of Research.” <i>Political Communication</i> 26: 193-211.                                                                                  | CG    | Meta-analysis on the internet                         |
| 40 | Bowler, S., Brockington, D., Donovan, T. 2001. “Election Systems and Voter Turnout: Experiments in the United States.” <i>Journal of Politics</i> 63(3): 902-15.                                                     | G     | US local elections                                    |
| 41 | Boyd, R.W. 1981. “Decline of U.S. Voter Turnout: Structural Explanations.” <i>American Politics Research</i> 9(1): 133–59.                                                                                           | S     | US 1964 election                                      |
| 42 | Brockington, D. 2004. “The Paradox of Proportional Representation: The Effect of Party Systems and Coalitions on Individuals’ Electoral Participation.” <i>Political Studies</i> 52(3): 469–90.                      | S     | Individual data                                       |
| 43 | Brown, R.D. & Wedeking, J. 2006. “People Who Have Their Tickets but Do Not Use Them: “Motor Voter”, Registration, and Turnout Revisited.” <i>American Politics Research</i> 34(4): 479–504.                          | CG, S | US states                                             |
| 44 | Caillier, J. 2010. “Citizen Trust, Political Corruption, and Voting Behavior: Connecting the Dots.” <i>Politics &amp; Policy</i> 38(5): 1015-35.                                                                     | S     | Individual level                                      |
| 45 | Calcagno, P.T. & Westley, C. 2008. “An Institutional Analysis of Voter Turnout: The Role of Primary Type and the Expressive and Instrumental Voting Hypotheses.” <i>Constitutional Political Economy</i> 19: 94-110. | CG    | US focus                                              |
| 46 | Caldeira, G.A. & Patterson, S.C., 1982. “Contextual Influences on Participation in US State Legislative Elections.” <i>Legislative Studies Quarterly</i> 7(3): 359-81.                                               | G     | US legislative elections                              |
| 47 | Campante, F. R. & Chor, D. 2012. “Schooling, Political Participation, and the Economy.” <i>Review of Economics and Statistics</i> 94(4): 841-59.                                                                     | S     | Individual level                                      |
| 48 | Cann, D.M. & Cole, J.B. 2011. “Strategic Campaigning, Closeness, and Voter Mobilization in U.S. Presidential Elections.” <i>Electoral Studies</i> 30(2): 344–52.                                                     | CG, S | US presidential elections                             |
| 49 | Caporale, T. & Poitras, M. 2014. “Voter Turnout in US Presidential Elections: Does Carville's Law Explain the Time Series?” <i>Applied Economics</i> . 46: 3630-8.                                                   | CG    | US presidential elections                             |

|    |                                                                                                                                                                                                                        |       |                           |
|----|------------------------------------------------------------------------------------------------------------------------------------------------------------------------------------------------------------------------|-------|---------------------------|
| 50 | Caren, N. 2007. "Big City, Big Turnout? Electoral Participation in American Cities." <i>Journal of Urban Affairs</i> 29: 31-46.                                                                                        | CG, S | US big cities             |
| 51 | Carter, J.R. 1984. "Early Projections and Voter Turnout in the 1980 Presidential Election." <i>Public Choice</i> 43, 195-202.                                                                                          | G     | US focus                  |
| 52 | Cebula R. J. & Meads, H. 2008. "The Electoral College System, Political Party Dominance, and Voter Turnout, with Evidence from the 2004 Presidential Election." <i>Atlantic Economic Journal</i> 36: 53-64.            | S     | US focus                  |
| 53 | Cebula, R. & Coombs, C. 2011. "The Influence of the Number of Statewide Legislative Referendums on Voter Participation in the US." <i>Applied Economics</i> 43(21): 2,823-31.                                          | S     | US focus                  |
| 54 | Cebula, R. J. 2007. "PAC Congressional Election Campaign Contributions and Other Political or Economic Influences on the Voter Participation Rate." <i>American Journal of Economics and Sociology</i> 66(2): 399-412. | S     | US focus                  |
| 55 | Cebula, R. J. 2008. "Does Direct Democracy Increase Voter Turnout? Evidence from the 2004 General Election." <i>American Journal of Economics and Sociology</i> 67(4): 629-644.                                        | S     | US focus                  |
| 56 | Cebula, R.J., Duquette, C.M. and Mixon, F. G. 2013. "Battleground States and Voter Participation in US Presidential Elections: An Empirical Test." <i>Applied Economics</i> 45(26): 3,795-9.                           | S     | US focus                  |
| 57 | Cebula, R.J. & Murphy, D.R. 1980. "The Electoral College and Voter Participation Rates: An Explanatory Note." <i>Public Choice</i> 35: 185-90.                                                                         | G     | A research note           |
| 58 | Cebula, R.J. & Murphy, D.R. 1984. "The Electoral College and Voter Participation Rates: A Reply." <i>Public Choice</i> 43: 101-2.                                                                                      | G     | This is a two-paged reply |
| 59 | Ceka, B. 2013. "The Perils of Political Competition: Explaining Participation and Trust in Political Parties in Eastern Europe." <i>Comparative Political Studies</i> 46(12): 1610-35.                                 | S     | Individual level          |
| 60 | Chapman, R.G. & Palda, K.S. 1983. "Electoral Turnout in Rational Voting and Consumption Perspectives." <i>Journal of Consumer Research</i> 9: 337-46.                                                                  | G     | 1970 Canadian provincial  |
| 61 | Clouse, C. 2011. "Changes in Congressional Turnout, 1972-2006." <i>Journal of Elections, Public Opinion, and Parties</i> 21: 453-72.                                                                                   | CG    | US Congress               |
| 62 | Cole, D. M. & Bryan, J. 2011. "Strategic Campaigning, Closeness, and Voter Mobilization in U.S. Presidential Elections." <i>Electoral Studies</i> 30(2): 344-52.                                                       | S     | US focus                  |
| 63 | Couse, C. 2011. "Changes in Congressional Turnout, 1972-2006." <i>Journal of Elections, Public Opinion and Parties</i> 21(4): 453-72.                                                                                  | S     | US focus                  |
| 64 | Couture, J., Breux, S., Bherer, L. 2014. "Analyse Ecologique des Determinants de la Participation Electorale Municipale au Quebec." <i>Canadian Journal of Political Science</i> 47: 787-812.                          | CG    | French                    |
| 65 | Cox, G.W. & Munger, M.C. 1989. "Closeness, Expenditures and Turnout in the 1982 US House Elections." <i>American Political Science Review</i> 83(1): 217-30.                                                           | G     | US House elections        |

|    |                                                                                                                                                                                                             |       |                        |
|----|-------------------------------------------------------------------------------------------------------------------------------------------------------------------------------------------------------------|-------|------------------------|
| 66 | Crain, W.M., Deaton, T.H. 1977. "A Note on Voter Participation as Consumption Behaviour." <i>Public Choice</i> 32: 131-5.                                                                                   | G     | Not applies            |
| 67 | Dandoy, R. 2014. "The Impact of E-voting on Turnout: Insights from the Belgian Case." In <i>Presented at the 2014 First International Conference on EDemocracy</i> . EGovernment(ICEDEG): 29-37.            | CG    | Belgian cities         |
| 68 | Davis, O. 1991. <i>A Multivariate Analysis of Voter Turnout in Louisiana Contested Nonpartisan Judicial Elections, 1981-1988</i> . Ph.D. dissertation. UMI Dissertation Services, Ann Arbor, Michigan.      | G     | Dissertation; US focus |
| 69 | Dawson, P.A. & Zinsler, J.E. 1976. "Political Finance and Participation in Congressional Elections." <i>Annals of the American Academy of Political and Sociological Science</i> 425: 59-73.                | G     | US focus               |
| 70 | De Paola, M., Scoppa, V. 2013. "The Impact of Closeness on Electoral Participation Exploiting the Italian Double Ballot System." <i>Public Choice</i> 160: 467-79.                                          | CG    | Italian localities     |
| 71 | De Paola, M., Scoppa, V., De Benedetto, M.A. 2014. "The Impact of Gender Quotas on Electoral Participation: Evidence from Italian Municipalities." <i>European Journal of Political Economy</i> 35: 141-57. | CG    | Italian localities     |
| 72 | De Witte, K. & Geys, B. 2015. "Strategic Housing Policy, Migration and Sorting Around Population Thresholds." CESifo Working Paper, No. 5639.                                                               | CG    | Local                  |
| 73 | Denver, D.T. & Halfacree, K., 1992. "Inter-constituency Migration and Turnout at the British General Election of 1983." <i>British Journal of Political Science</i> 22: 248-54.                             | G     | UK focus               |
| 74 | Denver, D.T. & Hands, G.H.T. 1974. "Marginality and Turnout in British General Elections." <i>British Journal of Political Science</i> 4: 17-35.                                                            | G     | UK focus               |
| 75 | Denver, D.T. & Hands, G.H.T. 1985. "Marginality and Turnout in General Elections in the 1970s." <i>British Journal of Political Science</i> 15: 381-98.                                                     | G     | UK focus               |
| 76 | Dettrey, B.J. & Schwindt-Bayer, L.A. 2009. "Voter Turnout in Presidential Democracies." <i>Comparative Political Studies</i> 42: 1317-38.                                                                   | CG, S | Presidential elections |
| 77 | Diwakar, R. 2008. "Voter Turnout in the Indian States: An Empirical Analysis." <i>Journal of Elections, Public Opinion and Parties</i> 18(1): 75-100.                                                       | CG, S | India specific         |
| 78 | Dodson, K. 2010. "The Return of the American Voter? Party Polarization and Voting Behavior, 1988 to 2004." <i>Sociological Perspectives</i> 53(8): 443-9.                                                   | S     | US focus               |
| 79 | Dubois, E. 2012. "Holidays and Turnout at Presidential Elections in France: An Update." <i>French Politics</i> 10: 181-187.                                                                                 | S     | France focus           |
| 80 | Dubois, E. & Lakhdar, C.B. 2007. "More on the Seasonal Determinants of Turnout: Holidays and French Presidential Elections." <i>French Politics</i> 5: 144-59.                                              | S     | France focus           |
| 81 | Durden, G.C. & Gaynor, P. 1987. "The Rational Behavior Theory of Voting Participation: Evidence from the 1970 and 1982 Elections." <i>Public Choice</i> 53: 231-42.                                         | G     | US focus               |



|    |                                                                                                                                                                                                                                                                                                  |      |                              |
|----|--------------------------------------------------------------------------------------------------------------------------------------------------------------------------------------------------------------------------------------------------------------------------------------------------|------|------------------------------|
| 82 | Dyck, J. J. & Seabrook, N.R. 2010. "Mobilized by Direct Democracy: Short-Term Versus Long-Term Effects and the Geography of Turnout in Ballot Measure Elections." <i>Social Science Quarterly</i> 91(1): 188-208.                                                                                | S    | US focus                     |
| 83 | Eagles, M. & Erfle, S. 1989. "Community Cohesion and Voter Turnout in English Parliamentary Constituencies." <i>British Journal of Political Research</i> 19: 115-25.                                                                                                                            | G    | English constituencies       |
| 84 | Eggers, A.C. 2015. "Proportionality and Turnout Evidence from French Municipalities." <i>Comparative Political Studies</i> 48(2) 137-67.                                                                                                                                                         | CG   | French localities            |
| 85 | Endersby, J.M., Galatas, S.E., Rackaway, C.B. 2002. "Closeness Counts in Canada: Voter Participation in the 1993 and 1997 Federal Elections." <i>Journal of Politics</i> 64(2): 610-31.                                                                                                          | G, S | Canada focus                 |
| 86 | Endersby, J.W. & Towle, M.J. 2014. "Making Wasted Votes Count: Turnout, Transfers, and Preferential Voting in Practice." <i>Election Studies</i> 33: 144-52.                                                                                                                                     | CG   | Ireland                      |
| 87 | Escaleras, M., Calcagno, P.T., Shughart, W.F. 2012. "Corruption and Voter Participation: Evidence from the US States." <i>Public Finance Review</i> 40(6): 789-815.                                                                                                                              | CG   | US focus                     |
| 88 | Eterovic, D.S. & Eterovic, N.A. 2012. "Political Competition Versus Electoral Participation: Effects on Government's Size." <i>Economics of Governance</i> 13: 333-63.                                                                                                                           | S    | Turnout independent variable |
| 89 | Fauvelle-Aymar, C. & Stegmeier, M. 2008. "Economic and Political Effects on European Parliamentary Electoral Turnout in Post-communist Europe." <i>Electoral Studies</i> 27(4): 661-72.                                                                                                          | S    | European elections           |
| 90 | Fauvelle-Aymar, C. 2008. "Electoral Turnout in Johannesburg: Socio-economic and Political Determinants." <i>Transformation</i> 66: 142-67.                                                                                                                                                       | CG   | Johannesburg analysis        |
| 91 | Fauvelle-Aymar, C. 2011. "Participation in the 2010 French Regional Elections: The Major Impact of a Change in the Electoral Calendar." <i>French Politics</i> 9: 1-20.                                                                                                                          | CG   | France focus                 |
| 92 | Fauvelle-Aymar, C. & François, A. 2006. "The Impact of Closeness on Turnout: An Empirical Relation Based on a Study of a Two-round Ballot." <i>Public Choice</i> 127: 469-91.                                                                                                                    | CG   | France focus                 |
| 93 | Fauvelle-Aymar, C. & Lewis-Beck, M.S. 2008. "TR versus PR: Effects of the French Double Ballot." <i>Electoral Studies</i> 27: 400-6.                                                                                                                                                             | CG   | France focus                 |
| 94 | Fieldhouse, E., Tranmer, M. & Russell, A. 2007. "Something About Young People or Something About Elections? Electoral Participation of Young People in Europe: Evidence from a Multilevel Analysis of the European Social Survey." <i>European Journal of Political Research</i> 46(6): 797-822. | S    | Individual focus             |
| 95 | Filer, J.E., Kenny, L.W., Morton, R.B. 1993. "Redistribution, Income and Voting." <i>American Journal of Political Science</i> 37(1): 63-87.                                                                                                                                                     | G    | US focus                     |
| 96 | Finkel, S.E. & Geer, J.G. 1998. "A Spot Check: Casting Doubt on the Demobilizing Effect of Attack Advertising." <i>American Journal of Political Science</i> 42(2): 573-95.                                                                                                                      | G    | US focus                     |
| 97 | Fitzgerald, M. 2005. "Greater Convenience but not Greater Turnout: The Impact of Alternative Voting Methods on Electoral Participation in the United States." <i>American Politics Research</i> 33(6): 842-67.                                                                                   | S    | US focus                     |

|     |                                                                                                                                                                                                                                                                            |       |                                |
|-----|----------------------------------------------------------------------------------------------------------------------------------------------------------------------------------------------------------------------------------------------------------------------------|-------|--------------------------------|
| 98  | Flickinger, R.S. & Studlar, D.T. 2007. "One Europe, Many Electorates? Models of Turnout in European Parliament Elections After 2004." <i>Comparative Political Studies</i> 40(4): 383-404.                                                                                 | S     | European elections             |
| 99  | Foster, C.B. 1984. "The Performance of Rational Voter Models in Recent Presidential Elections." <i>American Political Science Review</i> 78: 678-90.                                                                                                                       | G     | US focus                       |
| 100 | Fowler, A. 2013. "Electoral and Policy Consequences of Voter Turnout: Evidence from Compulsory Voting in Australia." <i>Quarterly Journal of Political Science</i> 8: 159-82.                                                                                              | CG    | Australia focus                |
| 101 | Fraga, B. & Hersh, E. 2011. "Voting Costs and Voter Turnout in Competitive Elections." <i>Quarterly Journal of Political Science</i> 5: 339-56.                                                                                                                            | CG    | US focus                       |
| 102 | Francia, P.L. & Herrnson, P.S. 2004. "The Synergistic Effect of Campaign Effort and Election Reform on Voter Turnout in State Legislative Elections." <i>State Politics &amp; Policy Quarterly</i> 4: 74-93.                                                               | CG    | US state legislative elections |
| 103 | Franklin, M.N. 1999. "Electoral Engineering and Cross-National Turnout Differences: What Role for Compulsory Voting?" <i>British Journal of Political Science</i> 29(1): 205-17.                                                                                           | S     | European elections             |
| 104 | Franklin, M.N. 2004." <i>Voter Turnout and the Dynamics of Electoral Competition in Established Democracies since 1945</i> . Cambridge: Cambridge University Press.                                                                                                        | S     | Book                           |
| 105 | Franklin, M.N. & Hobolt, S.B. 2011. "The Legacy of Lethargy: How Elections to the European Parliament Depress Turnout." <i>Electoral Studies</i> 30(1): 67-76.                                                                                                             | S     | European elections             |
| 106 | Franklin, M.N. 1996. "Electoral Participation." In: <i>Comparing Democracies: Elections and Voting in Global Perspective</i> . Thousand Oaks: Sage: 214-33.                                                                                                                | CG    | Book chapter                   |
| 107 | Franklin, M.N. & Hirczy de Mino, W.P. 1998. "Separated Powers, Divided Government and Turnout in US Presidential Elections." <i>American Journal of Political Science</i> 42(1) 316-26.                                                                                    | G     | US presidential elections      |
| 108 | Freire, A., Martins, R., Meirinho, M. 2012. "Electoral Rules, Political Competition, and Citizens' Participation in the Portuguese Local Elections, 1979-2009." <i>Portuguese Journal of Social Science</i> 11: 189-208.                                                   | CG    | Portuguese elections           |
| 109 | Freitag, M. 2005. "The Swiss as Laboratory: A Comparative Analysis of Voting Participation in Parliamentary Elections of the Swiss Cantons." <i>Kölner Zeitschrift für Soziologie und Sozialpsychologie</i> .                                                              | S     | Switzerland focus              |
| 110 | Freitag, M., 2010. "Structure Versus Culture: A Comparative Study of the Influence of Political Institutions and Cultural Modernization Factors on Voter Turnout in Swiss Sub-national Parliamentary Elections." <i>International Political Science Review</i> 31: 428-48. | CG, S | Switzerland focus              |
| 111 | Fullerton A. S. & Borch, C. 2008. "Reconsidering Explanations for Regional Convergence in Voter Registration and Turnout in the United States, 1956-2000." <i>Sociological Forum</i> 23(4): 755-785.                                                                       | S     | US focus                       |
| 112 | Funk, P. 2010. "Social Incentives and Voter Turnout: Evidence from the Swiss Mail Ballot System." <i>Journal of the European Economics Association</i> 8: 1077-03.                                                                                                         | CG    | Switzerland focus              |
| 113 | Funk, P. & Gathmann, C. 2013. "How do Electoral Systems Affect Fiscal Policy? Evidence from Cantonal Parliaments, 1890-2000." <i>Journal of the European Economics Association</i> 11: 1,178-1,203.                                                                        | CG    | Switzerland focus              |

|     |                                                                                                                                                                                                                                                   |       |                                                  |
|-----|---------------------------------------------------------------------------------------------------------------------------------------------------------------------------------------------------------------------------------------------------|-------|--------------------------------------------------|
| 114 | Galais, C. & Blais, A. 2016. "Do People Feel More of a Duty to Vote in Some Elections?" <i>West European Politics</i> 39(4): 1-23.                                                                                                                | CG    | Individual data                                  |
| 115 | Galatas, S.E. 2004. "Electing the First Parliament: Party Competition and Voter Participation in Scotland." <i>Party Politics</i> 10(2): 213-33.                                                                                                  | S     | Scotland focus                                   |
| 116 | Galbraith, J.K. & Hale, J.T. 2008. "State Income Inequality and Presidential Election Turnout and Outcomes." <i>Social Science Quarterly</i> 89: 887-901.                                                                                         | CG, S | US focus                                         |
| 117 | Gallagher, M. 1991. "Proportionality, Disproportionality and Electoral Systems." <i>Electoral Studies</i> 10: 33-51.                                                                                                                              | CG    | Not on topic                                     |
| 118 | Gallego, A. & Anduiza, E. 2012. "Disproportionality and Voter Turnout in New and Old Democracies." <i>Electoral Studies</i> 31(1): 159-169.                                                                                                       | S     | Spain focus                                      |
| 119 | Garmann, S. 2014. "A Note on Electoral Competition and Turnout in Run-off Electoral Systems: Taking into Account both Endogeneity and Attenuation Bias." <i>Electoral Studies</i> 34: 261-5.                                                      | CG    | German local elections                           |
| 120 | Gerber, A.S., Green, D.P., Shachar, R. 2003. "Voting May be Habit-forming: Evidence from a Randomized Field Experiment." <i>American Journal of Political Science</i> 47: 540-550.                                                                | CG    | US focus                                         |
| 121 | Geys, B. & Heyndels, B. 2002. "Disentangling the Effects of Political Fragmentation on Voter Turnout: The Flemish Municipal Elections." Paper presented at the Annual EPCS Conference, Belgirate, Italy, April 2002.                              | G     | Flemish local elections; conference presentation |
| 122 | Geys, B. & Mause, K. 2016. "The Limits of Electoral Control: Evidence from Last-term Politicians." <i>Legislative Studies Quarterly</i> 41(4): 873-98.                                                                                            | CG    | Not related                                      |
| 123 | Gibbs Knotts, H. & Haspel, M. 2006. "The Impact of Gentrification on Voter Turnout." <i>Social Science Quarterly</i> 87(1): 110-21.                                                                                                               | S     | Atlanta, US focus                                |
| 124 | Gilliam, F.D., 1985. "Influences on Voter Turnout for US House Elections in Non-presidential Years." <i>Legislative Studies Quarterly</i> 10(3): 339-51.                                                                                          | G     | US focus                                         |
| 125 | Goodin, R. & Dryzek, J. 1980. "Rational Participation: The Politics of Power." <i>British Journal of Political Science</i> 10(3): 273-90.                                                                                                         | S     | Theory focus                                     |
| 126 | Green, D.P. & Shachar, R. 2000. "Habit Formation and Political Behaviour: Evidence of Consuetude in Voter Turnout." <i>British Journal of Political Science</i> 30: 561-73.                                                                       | CG    | US focus only                                    |
| 127 | Grofman, B. 1993. "Is Turnout the Paradox that Ate Rational Choice Theory?" In B. Grofman (ed.), <i>Information, Participation, and Choice: An Economic Theory of Democracy in Perspective</i> . Ann Arbor: University of Michigan Press: 93-103. | S     | Theory; book chapter                             |
| 128 | Grofman, B. & Selb, P. 2011. "Turnout and the (Effective) Number of Parties at the National and District Levels: A Puzzle-solving Approach." <i>Party Politics</i> 17(1): 93-117.                                                                 | CG, S | Switzerland & Spain                              |
| 129 | Grofman, B., Collett, C., Griffin, R. 1998. "Analysing the Turnout-competition Link with Aggregate Cross-sectional Data." <i>Public Choice</i> 95: 233-46.                                                                                        | G     | US focus                                         |

|     |                                                                                                                                                                                                                       |       |                                 |
|-----|-----------------------------------------------------------------------------------------------------------------------------------------------------------------------------------------------------------------------|-------|---------------------------------|
| 130 | Gronke, P. & Miller, P. 2012. "Voting by Mail and Turnout in Oregon: Revisiting Southwell and Burchett." <i>American Politics Research</i> 40(6): 976-97.                                                             | S     | US focus                        |
| 131 | Gronke, P., Galanes-Rosenbaum, E., Miller, P.A. 2007. "Early Voting and Turnout." <i>PS: Political Science and Politics</i> 40: 639-45.                                                                               | CG, S | US focus                        |
| 132 | Gunther, R. 2005. "Parties and Electoral Behavior in Southern Europe." <i>Comparative Politics</i> 37(3): 253-75.                                                                                                     | S     | Not relevant                    |
| 133 | Hanmer M.J. & Traugott, M.W. 2004. "The Impact of Voting by Mail on Voter Behavior." <i>American Politics Research</i> 32(4): 375-405.                                                                                | S     | US focus                        |
| 134 | Hansen, T. 1994. "Local Elections and Local Government Performance." <i>Scandinavian Political Studies</i> 17(1): 1-30.                                                                                               | G     | Norway local elections          |
| 135 | Haselswerdt, M.V. 2009. "Con Job: An Estimate of Ex-Felon Voter Turnout Using Document-Based Data." <i>Social Science Quarterly</i> 90(2): 262-73.                                                                    | S     | US focus                        |
| 136 | Henderson, A. & McEwen, N. 2010. "A Comparative Analysis of Voter Turnout in Regional Elections." <i>Electoral Studies</i> 29(3): 405-16.                                                                             | CG, S | Subnational focus               |
| 137 | Highton, B. 2004. "Voter Registration and Turnout in the United States." <i>Perspectives on Politics</i> 2(3): 507-15.                                                                                                | S     | US focus                        |
| 138 | Highton, B. 2006. "Long Lines, Voting Machine Availability, and Turnout: The Case of Franklin County, Ohio in the 2004 Presidential Election." <i>PS: Political Science &amp; Politics</i> 39(1): 65-68.              | S     | US focus                        |
| 139 | Hill, K.Q. & Leighley, J.E. 1993. "Party Ideology, Organisation and Competitiveness as Mobilizing Forces in Gubernatorial Elections." <i>American Journal of Political Science</i> 37(4): 1,158-78.                   | G     | US focus                        |
| 140 | Hill, K.Q. & Leighley, J.E. 1999. "Racial Diversity, Voter Turnout and Mobilizing Institutions in the United States." <i>American Politics Quarterly</i> 27(3): 275-95.                                               | G     | US focus                        |
| 141 | Hillman, A.L., Metsuyanin, K., Potrafke, N. 2015. "Democracy with Group Identity." <i>European Journal of Political Economy</i> 40: 274-87.                                                                           | CG    | Israel focus                    |
| 142 | Hiskey, J.T., Goodman, G.L., 2011. "The Participation Paradox of Indigenous Autonomy in Mexico." <i>Latin American Politics and Society</i> 53(2): 61-86.                                                             | CG    | Mexico focus                    |
| 143 | Hoffman R. & Lazaridis, D. 2013. "The Limits of Compulsion: Demographic Influences on Voter Turnout in Australian State Elections." <i>Australian Journal of Political Science</i> 48(1): 28-43.                      | S     | Australia focus                 |
| 144 | Hoffman-Martinot, V. 1994. Voter Turnout in French Municipal Elections." In: Lopez-Nieto, L. (Ed.) <i>Local Elections in Europe</i> . Barcelona: Institut de ciències polítiques I socials:13-42.                     | CG, G | French localities; book chapter |
| 145 | Hoffman-Martinot, V., Rallings, C., Thrasher, M. 1996. "Comparing Local Electoral Turnout in Great-Britain and France: More Similarities than Differences?" <i>European Journal of Political Research</i> 30: 241-57. | G     | Local comparisons in France, UK |

|     |                                                                                                                                                                                                                                   |       |                                    |
|-----|-----------------------------------------------------------------------------------------------------------------------------------------------------------------------------------------------------------------------------------|-------|------------------------------------|
| 146 | Hogan, R.E. 1999. "Campaign and Contextual Influences on Voter Participation in State Legislative Elections." <i>American Politics Quarterly</i> 27(4): 403-33.                                                                   | G     | US district-level                  |
| 147 | Hogan, R.E. 2013. "Campaign Spending and Voter Participation in State Legislative Elections." <i>Social Science Quarterly</i> 94: 840-64.                                                                                         | CG    | US state legislative elections     |
| 148 | Holbrook, T. & Heidbreder, B. 2010. "Turnout in the United States: Does Measurement Matter? The Case of VAP and VEP in Models of Voter Turnout." <i>State and Policy Quarterly</i> 10(2): 157-79.                                 | CG, S | On measurement                     |
| 149 | Holbrook, T.M. & Weinschenk, A.C., 2014. "Campaigns, Mobilization, and Turnout in Mayoral Elections." <i>Political Research Quarterly</i> 67: 42-55.                                                                              | CG    | US mayoral elections               |
| 150 | Holbrook, T.T. and McClurc, S.D. 2005. "The Mobilization of Core Supporters: Campaigns, Turnout, and Electoral Composition in United States Presidential Elections." <i>American Journal of Political Science</i> 49(4): 689-703. | S     | US focus                           |
| 151 | Horiuchi, Y. 2005. <i>Institutions, Incentives and Electoral Participation in Japan: Cross-level and Cross-national Perspectives</i> . London: Routledge.                                                                         | CG    | Book. Japanese local elections     |
| 152 | Horn, D. 2011. "Income Inequality and Voter Turnout." Growing Inequalities' Impacts (GINI) Discussion Paper 16, October.                                                                                                          | S     | Individual level, discussion paper |
| 153 | Indridason, I.H. 2008. "Competition and Turnout: The Majority Run-off as a Natural Experiment." <i>Electoral Studies</i> 27(4): 699-710.                                                                                          | S     | France focus                       |
| 154 | J.P. Pelissero, T.B. Krebs, S. Jenkins. 2000. "Asian-Americans, Political Organisations and Participation in Chicago Electoral Precincts." <i>Urban Affairs Review</i> 35(6): 750-69.                                             | G     | US focus                           |
| 155 | Jackson, R.A. 1997. "The Mobilisation of US State Electorates in the 1988 and 1990 Elections." <i>Journal of Politics</i> 59(2): 520-37.                                                                                          | G     | US focus                           |
| 156 | Jeffrey, C. & Hough, D. 2003. "Regional Elections in Multi-Level Systems." <i>European Urban and Regional Studies</i> 10(3): 199-212.                                                                                             | S     | Regional elections                 |
| 157 | Johnston, R., Matthews, S.J. & Bittner, A. 2007. "Turnout and the Party System in Canada, 1988-2004." <i>Electoral Studies</i> 26(4): 735-45.                                                                                     | S     | Canada focus                       |
| 158 | Joo, M.-S. & Yun, S. 2014. "Expressiveness and Voting Decision: New Evidence from the Korean Parliamentary Election." <i>Japan Journal of Political Science</i> 15: 259-74.                                                       | CG    | Korea focus                        |
| 159 | Joshi, D. K. 2012. "The Impact of India's Regional Parties on Voter Turnout and Human Development." <i>Journal of South Asian Development</i> 7(2): 139-60.                                                                       | S     | India focus                        |
| 160 | Jou, W. 2010. "Voter Turnout in Japan: An Aggregate-level Analysis of the 2005 and 2009 General Elections." <i>Asian Survey</i> 50: 1,032-57.                                                                                     | CG, S | Japan focus                        |
| 161 | Kanazawa, S. 2000. "A New Solution to the Collective Action Problem: The Paradox of Voter Turnout." <i>American Sociological Review</i> 65: 433-42.                                                                               | CG    | Individual analysis                |

|     |                                                                                                                                                                                                                                         |       |                                               |
|-----|-----------------------------------------------------------------------------------------------------------------------------------------------------------------------------------------------------------------------------------------|-------|-----------------------------------------------|
| 162 | Kanioviski, S. & Mueller, D.C. 2006. "Community Size, Heterogeneity and Voter Turnout." <i>Public Choice</i> 129: 399-415.                                                                                                              | CG    | Norwegian local elections                     |
| 163 | Karahan, G.R., Coats, R.M., Ii, W.F.S. 2006. "Corrupt Political Jurisdictions and Voter Participation." <i>Public Choice</i> 126: 87-106.                                                                                               | CG    | Alabama                                       |
| 164 | Karnig, A.K., Walter, O.B. 1974. "Electoral Turnout in Municipal Elections: A Multivariate Analysis." <i>The Rocky Mountain Social Science Journal</i> 11(2): 55-71.                                                                    | G     | Municipal elections                           |
| 165 | Kau, J.B. & Rubin, P.H. 1976. "The Electoral College and the Rational Vote." <i>Public Choice</i> 27: 101-7.                                                                                                                            | G     | US focus                                      |
| 166 | Kauder, B., Potrafke, N. 2015. "Just Hire Your Spouse! Evidence from a Political Scandal in Bavaria." <i>European Journal of Political Economy</i> 38: 42-54.                                                                           | CG    | Bavaria                                       |
| 167 | Kelley, S.J., Ayres, R.E., Bowen, W.G. 1967. "Registration and Voting: Putting First Things First." <i>American Political Science Review</i> 61: 359-79.                                                                                | CG    | US focus                                      |
| 168 | Kim, J.-O., Petrocik, J.R., Enokson, S.N. 1975. "Voter Turnout Among the American States: Systemic and Individual Components." <i>American Political Science Review</i> 69: 107-23.                                                     | G     | US focus                                      |
| 169 | Kirchgassner, G. & Schimmelpfennig, J. 1992. "Closeness Counts if it Matters for Electoral Victory: Some Empirical Results for the United Kingdom and the Federal Republic of Germany." <i>Public Choice</i> 73: 283-99.                | G     | UK and Germany                                |
| 170 | Kirchgassner, G. & Schulz, T., 2004. Expected closeness or mobilisation: why do voters go to the polls? Empirical results for Switzerland, 1981-1999." Paper presented at the Annual Public Choice Society Conference, Baltimore, 2004. | G     | Swiss data referenda; conference presentation |
| 171 | Kirchgassner, G. & Zu Himmern, A".-M., 1997. "Expected Closeness and Turnout: An Empirical Analysis for the German General Elections, 1983-1994." <i>Public Choice</i> 91: 3-25.                                                        | G     | Germany focus                                 |
| 172 | Kraaykamp, G., van Dam, M., Toonen, T., 2001. "Institutional Change and Political Participation: The Effects of Municipal Amalgamation on Local Electoral Turnout in The Netherlands." <i>Acta Politica</i> 36(4), 402-18.              | G     | Netherlands focus                             |
| 173 | Kunce, M., 2001. "Pre-election Polling and the Rational Voter: Evidence from State Panel Data (1986-1998)." <i>Public Choice</i> 107, 21-34.                                                                                            | G     | US focus                                      |
| 174 | Kuncic, A. 2011. "Aid Us to Win the Elections: Foreign Aid and Voter Turnout." <i>Development Economics</i> 49: 233-65.                                                                                                                 | CG, S | Includes non-democracies                      |
| 175 | Ladner, A. & Fiechter, J. 2012. "The Influence of Direct Democracy on Political Interest, Electoral Turnout and Other Forms of Citizens' Participation in Swiss Municipalities." <i>Local Government Studies</i> 38(4): 437-59.         | CG    | Switzerland focus                             |
| 176 | Ladner, A. & Milner, H., 1999. "Do Voters Turn Out More Under Proportional than Majoritarian Systems? The Evidence from Swiss Communal Elections." <i>Electoral Studies</i> 18: 235-50.                                                 | CG, S | Switzerland focus                             |
| 177 | Lago, I., Lobo, M.C., 2014. "Partisan Turnout Bias and District Magnitude." <i>Electoral Studies</i> 35: 150-8.                                                                                                                         | CG    | Portugal focus                                |

|     |                                                                                                                                                                                                                                   |       |                             |
|-----|-----------------------------------------------------------------------------------------------------------------------------------------------------------------------------------------------------------------------------------|-------|-----------------------------|
| 178 | Lakhdar, C. B. & Dubois, E. 2006. "Climate and Electoral Turnout in France." <i>French Politics</i> 4: 137-57.                                                                                                                    | S     | French focus                |
| 179 | Lapp, M., 1999. "Incorporating Groups into Rational Choice Explanations of Turnout: An Empirical Test." <i>Public Choice</i> 98: 171-85.                                                                                          | G     | Canada focus                |
| 180 | Larocca, R. & Klemanski, J. S. 2011. "U.S. State Election Reform and Turnout in Presidential Elections." <i>State Politics and Policy Quarterly</i> 11(1): 76-101.                                                                | S     | US focus                    |
| 181 | Lau, R.R., Pomper, G.M. 2001. "Effects of Negative Campaigning on Turnout in U.S. Senate Elections, 1988-98." <i>Journal of Politics</i> 63(3): 804-19.                                                                           | G     | US Senate focus             |
| 182 | Lee, J. 2004. "Voter Turnout 'Surge and Decline': Asian New Democracies." <i>Korea Observer</i> 35(2): 275-97.                                                                                                                    | S     | Descriptive                 |
| 183 | Lefevere, J. & Van Aelst, P. 2014. "First-order, Second-order or Third-rate? A Comparison of Turnout in European, Local and National Elections in the Netherlands." <i>Electoral Studies</i> 35: 159-70.                          | CG    | Netherlands focus           |
| 184 | Lehoucq, F. and Wall, D.L. 2004. "Explaining Voter Turnout Rates in New Democracies: Guatemala." <i>Electoral Studies</i> 23(3): 485-500.                                                                                         | S     | Guatemala focus             |
| 185 | Levine, P. & Lopez, M. 2002. "Youth Voter Turnout Has Declined by Any Measure." Center for Information and Research on Civic Learning & Engagement Fact Sheet.                                                                    | S     | US focus, not peer-reviewed |
| 186 | Lijphart, A. 1994. <i>Electoral Systems and Party Systems: A Study of Twenty-Seven Democracies, 1945-1990</i> . Oxford: Oxford University Press.                                                                                  | S     | Book                        |
| 187 | Loewen, P.J. & Blais, A. 2006. "Did Bill C-24 Affect Voter Turnout? Evidence from the 2000 and 2004 Elections." <i>Canadian Journal of Political Science</i> 39: 935-43.                                                          | CG    | Canada focus                |
| 188 | Lou, D. 2009. "Paradox in Political Participation and Economic Development—A Study of Congressional Voting in Urban China in 1993 and 2002." <i>Journal of Chinese Political Science</i> 14: 167-90.                              | S     | China focus                 |
| 189 | Lowndes, V., Pratchett, L. & Stoker, G. 2006. "Local Political Participation: The Impact of Rules-in-use." <i>Public Administration</i> 84(3): 539-61.                                                                            | S     | UK local focus              |
| 190 | Lutz, J.M. 1991. "Marginality, Major Third Parties and Turnout in England in the 1970s and 1980s: A Reanalysis and Extension." <i>Political Studies</i> 39(4): 720-6.                                                             | G     | UK focus                    |
| 191 | Mahler, V.A. 2002. "Explaining the Subnational Dimensions of Income Inequality: An Analysis of the Relationship between Inequality and Turnout in the Developed Countries." <i>International Studies Quarterly</i> 46(1): 117-42. | CG, S | Regional elections          |
| 192 | Marien, S., Dassonneville, R., Hooghe, M. 2015. "How Second Order are Local Elections? Voting Motives and Party Preferences in Belgian Municipal Elections." <i>Local Government Studies</i> 41: 898-916.                         | CG    | Belgian cities              |
| 193 | Martin, C. W. & Plumper, T. 2005. "Number of Parties, Endogenous Partisan Preferences, and Electoral Turnout Rates." <i>Social Science Computer Review</i> 23(3): 347-59.                                                         | S     | Computer simulation         |

|     |                                                                                                                                                                                                  |       |                          |
|-----|--------------------------------------------------------------------------------------------------------------------------------------------------------------------------------------------------|-------|--------------------------|
| 194 | Martins, R., Veiga, F.J. 2012. "Economic Performance and Turnout at National and Local Elections." <i>Public Choice</i> 157: 429-48.                                                             | CG, S | Portugal focus           |
| 195 | Matsubayashi, T. & Wu, J.D. 2012. "Distributive Politics and Voter Turnout." <i>Journal of Elections, Public Opinion and Parties</i> 22(2): 167–86.                                              | S     | US focus                 |
| 196 | Matusaka, J.G. 1993. "Election Closeness and Voter Turnout: Evidence from California Ballot Propositions." <i>Public Choice</i> 76: 313-34.                                                      | G     | US focus                 |
| 197 | Matusaka, J.G., Palda, F. 1993. "The Downsian Voter Meets the Ecological Fallacy." <i>Public Choice</i> 77: 855-78.                                                                              | G     | Individual level; Canada |
| 198 | Mattila, M. 2002. "Why Bother? Determinants of Turnout in the European Elections." <i>Electoral Studies</i> 22: 449-68.                                                                          | G     | EU elections             |
| 199 | McDonald, M. & Popkin, S.L. 2001. "The Myth of the Vanishing Voter." <i>American Political Science Review</i> 95(4): 963–74.                                                                     | S     | On measurement           |
| 200 | McDonald, M. P. & Tolbert, C. J. 2012. "Perceptions vs. Actual Exposure to Electoral Competition and Effects on Political Participation." <i>Public Opinion Quarterly</i> 76(3): 538-54.         | S     | US focus                 |
| 201 | McLaughlin, E.S. 2014. "Did Floor-crossing Alienate South African Voters? Evidence from Municipal Legislatures." <i>Politikon</i> 41: 289-310.                                                   | CG    | South Africa focus       |
| 202 | Merrifield, J. 1993. "The Institutional and Political Factors that Influence Voter Turnout." <i>Public Choice</i> 77: 657-67.                                                                    | G     | US focus                 |
| 203 | Michelsen, C., Boenisch, P., Geys, B. 2013. "(De)Centralization and Voter Turnout: Theory and Evidence from German Municipalities." <i>Public Choice</i> 159: 469-83.                            | CG    | German local elections   |
| 204 | Miles, T. J. 2004. "Felon Disenfranchisement and Voter Turnout." <i>Journal of Legal Studies</i> 33(1): 85-129.                                                                                  | S     | US focus                 |
| 205 | Milner, H. & Ladner, A. 2006. "Can PR Voting Serve as a Shelter against Declining Turnout? Evidence from Swiss Municipal Elections." <i>International Political Science Review</i> 27(1): 29–45. | CG, S | Swiss focus              |
| 206 | Morlan, R.L. 1984. "Municipal vs. National Election Voter Turnout: Europe and the United States." <i>Political Science Quarterly</i> 99: 457-70.                                                 | CG    | Local elections          |
| 207 | Morton, R.B. & Williams, K.C. 2010. <i>Experimental Political Science and the Study of Causality: from Nature to the Lab</i> . Cambridge University Press, Cambridge.                            | CG    | Book                     |
| 208 | Mueller, D.C. 2003. <i>Public Choice III</i> . Cambridge University Press, Cambridge.                                                                                                            | CG    | Book                     |
| 209 | Musial-Karg, M. 2012. "Is Electronic Voting a Panacea for Low Election Turnout? Examples of Estonian E-elections and Swiss E-referendums." <i>Polish Political Science Yearbook</i> 41:428-443.  | S     | Referendums              |
| 210 | Nalder, K. 2007. "The Effect of State Legislative Term Limits on Voter Turnout." <i>State Politics and Policy Quarterly</i> 7: 187-210.                                                          | CG, S | US focus                 |



|     |                                                                                                                                                                                                                                          |       |                        |
|-----|------------------------------------------------------------------------------------------------------------------------------------------------------------------------------------------------------------------------------------------|-------|------------------------|
| 211 | Neiheisel, J.R. & Burden, B.C. 2012. "The Impact of Election-day Registration on Voter Turnout and Election Outcomes." <i>American Politics Research</i> 40(4): 636-64.                                                                  | CG, S | US focus               |
| 212 | Nikolenyi, C. 2010. "Concurrent Elections and Voter Turnout: The Effect of the Delinking of State Elections on Electoral Participation in India's Parliamentary Polls, 1971-2004." <i>Political Studies</i> 58, 214-33.                  | CG, S | Indian focus           |
| 213 | Norris, P. 2002. <i>Electoral Engineering: Voting Rules and Political Behavior</i> . New York: Cambridge University Press.                                                                                                               | S     | Book                   |
| 214 | Oliver, J.E., 2012. <i>Local Elections and the Politics of Small-scale Democracy</i> . Princeton University Press, Princeton.                                                                                                            | CG    | Book                   |
| 215 | Omeje, K. 2008. "Challenges to State Legitimacy and Institutional Channels of Political Participation in Africa." <i>Africa Insight</i> 37(4): 183-91.                                                                                   | S     | No data. Theory.       |
| 216 | Orford, S., Railings, C., Thrasher, M., Borisjuk, G. 2011. "Changes in the Probability of Voter Turnout when Resiting Polling Stations: A Case Study in Brent, UK." <i>Environment and Planning C: Politics and Space</i> 29(1): 149-69. | CG, S | Brent, UK focus        |
| 217 | Ostrosky, A.L. 1984. "The Electoral College and Voter Participation Rates: A Comment." <i>Public Choice</i> 43: 99-100                                                                                                                   | G     | US focus               |
| 218 | Owen, G., Grofman, B. 1984. "To Vote or Not to Vote: The Paradox of Nonvoting." <i>Public Choice</i> 42: 311-25.                                                                                                                         | CG    | Theory focus           |
| 219 | Panagopoulos, C. 2011. "Voter Turnout in the 2010 Congressional Midterm Elections." <i>PS: Political Science &amp; Politics</i> 44(2): 317-9.                                                                                            | S     | US focus               |
| 220 | Pattie, C. & Johnston, R. 1998. "Voter Turnout at the British General Election of 1992: Rational Choice, Social Standing or Political Efficacy?" <i>European Journal of Political Research</i> 33: 263-83.                               | G, S  | UK focus               |
| 221 | Pattie, C., Johnston, R., Rossiter, D., 2012. "Change the Seats, Change the Participation? Parliamentary Redistricting and Constituency Turnout." <i>Representation</i> 48: 419-428.                                                     | CG    | UK focus               |
| 222 | Pelkonen, P. 2012. "Length of Compulsory Education and Voter Turnout: Evidence from a Staged Reform." <i>Public Choice</i> 150(1-2): 51-75.                                                                                              | S     | Norway focus           |
| 223 | Perea, E.A., 2000. <i>¿Individuos o Sistemas? Las Razones de la Abstencio'n en Europa Occidental</i> . Ph.D. dissertation. Centro de Investigaciones, Madrid.                                                                            | G     | Book, Spanish language |
| 224 | Plutzer, E. 2002. "Becoming a Habitual Voter: Inertia, Resources, and Growth in Young Adulthood." <i>American Political Science Review</i> 96: 41-56.                                                                                    | CG    | US focus               |
| 225 | Potrafke, N. & Roesel, F. 2020. "Opening Hours of Polling Stations and Voter Turnout: Evidence from a Natural Experiment." <i>Review of International Organizations</i> 15: 133-63.                                                      | CG    | Austria focus          |
| 226 | Powell, B.G. 1980. "Voting Turnout in 30 Democracies: Partisan, Legal and Socio-economic Influences." In: Rose, R. (Ed.) <i>Electoral Participation: A Comparative Analysis</i> . London: Sage: 5-34.                                    | G     | Book chapter           |

|     |                                                                                                                                                                                                                                                                     |       |                              |
|-----|---------------------------------------------------------------------------------------------------------------------------------------------------------------------------------------------------------------------------------------------------------------------|-------|------------------------------|
| 227 | Powell, G.B. 1982. <i>Contemporary Democracies: Participation, Stability, and Violence</i> . Cambridge, MA: Harvard University Press.                                                                                                                               | S     | Book                         |
| 228 | Power, T.J., 2009. "Compulsory for Whom? Mandatory Voting and Electoral Participation in Brazil, 1986-2006." <i>Journal of Politics in Latin America</i> 1(1): 97-122.                                                                                              | CG, S | Brazil focus                 |
| 229 | Preuss, G.G. 1981. "The Effects of Density and Urban Residence on Voter Turnout." <i>Population and Environment</i> 4(4): 246-65.                                                                                                                                   | G     | US focus                     |
| 230 | Przeworski, A. 2009. "Constraints and Choices. Electoral Participation in Historical Perspective." <i>Comparative Political Studies</i> 42(1): 4-30.                                                                                                                | S     | On turnout but not aggregate |
| 231 | Quintelier, E., Hooghe, M. and Marien, S. 2011. "The Effect of Compulsory Voting on Turnout Stratification Patterns: A Cross National Analysis." <i>International Political Science Review</i> 34(4): 396-416.                                                      | S     | Individual data              |
| 232 | Rallings, C. and Thrasher, M. 2007. "The Turnout 'Gap' and the Costs of Voting—A Comparison of Participation at the 2001 General and 2002 Local Elections in England." <i>Public Choice</i> 131(3-4): 333-344.                                                      | S     | England focus                |
| 233 | Rallings, C. & Thrasher, M. 2005. "Not All 'Second-Order' Contests are the Same: Turnout and Party Choice at the Concurrent 2004 Local and European Parliament Elections in England." <i>British Journal of Politics and International Relations</i> 7(4): 584-597. | S     | British focus                |
| 234 | Rallings, C. & Thrasher, M. 2009. "Another (Small) Step on the Road Towards a Multi-party Britain - Turnout and Party Choice at the 2009 Local and European Parliament elections." <i>British Politics</i> 4: 463-477.                                              | S     | Britain focus                |
| 235 | Reif, K. & Schmitt, H. 1980. "Nine Second-order National Elections: A Conceptual Framework for the Analysis of European Election Results." <i>European Journal of Political Research</i> 8(1): 3-44.                                                                | CG, S | EU elections                 |
| 236 | Remmer, K.L. 2010. "Political Scale and Electoral Turnout: Evidence from the Less Industrialized World." <i>Comparative Political Studies</i> 43: 275-303.                                                                                                          | CG, S | Costa Rica focus             |
| 237 | Richey, S. 2008. "Voting by Mail: Turnout and Institutional Reform in Oregon." <i>Social Science Quarterly</i> 89: 902-15.                                                                                                                                          | CG, S | Oregon, US focus             |
| 238 | Robbins, J.W. 2010. "The Personal Vote and Voter Turnout." In: <i>Electoral Studies, Special Symposium: The 2008 U.S. Presidential Election</i> 29: 661-72.                                                                                                         | CG    | US focus                     |
| 239 | Rose, R. & Borz, G. 2013. "Institutional Stimuli and Individual Response as Explanations of Turnout: The 2009 EP Election." <i>Journal of Elections, Public Opinion and Parties</i> 23(4): 405-22.                                                                  | S     | EU election                  |
| 240 | Roseman, G.H. Jr. & Stephenson, E. F. 2005. "The Effect of Voting Technology on Voter Turnout: Do Computers Scare the Elderly?" <i>Public Choice</i> 123: 39-47.                                                                                                    | S     | US focus                     |
| 241 | Rosenthal, H. & Sen, S. 1973. "Electoral Participation in the French Fifth Republic." <i>American Political Science Review</i> 67(1): 29-54.                                                                                                                        | G     | France focus                 |

|     |                                                                                                                                                                                                          |       |                                       |
|-----|----------------------------------------------------------------------------------------------------------------------------------------------------------------------------------------------------------|-------|---------------------------------------|
| 242 | Patterson, S.C. & Caldeira, G.A. 1983. "Getting Out the Vote: Participation in Gubernatorial Elections." <i>American Political Science Review</i> 77: 675-89.                                            | G     | US focus                              |
| 243 | Sampson, R.J. 1988. "Local Friendship Ties and Community Attachment in Mass Society: A Multilevel Systemic Model." <i>American Sociological Review</i> 53: 766-79.                                       | CG    | UK focus                              |
| 244 | Schakel, A.H. & Dandoy, R. 2014. "Electoral Cycles and Turnout in Multilevel Electoral Systems." <i>West European Politics</i> 37(3): 605-23.                                                            | CG    | Regional elections and national       |
| 245 | Seidle, L. & Miller, D. 1976. "Turnout, Rational Abstention and Campaign Effort." <i>Public Choice</i> 27: 121-6.                                                                                        | G     | US focus                              |
| 246 | Selb, P., 2009. "A Deeper Look at the Proportionality Turnout Nexus." <i>Comparative Political Studies</i> 42: 527-48.                                                                                   | CG, S | District level in 31 countries        |
| 247 | Sellers, J.M., Kübler, D., Walter-Rogg, M., Walks, R.A. 2013. <i>The Political Ecology of the Metropolis: Metropolitan Sources of Electoral Behaviour in Eleven Countries</i> . Colchester: ECPR Press.  | CG    | Book                                  |
| 248 | Settle, R.F., Abrams, B.A. 1976. "The Determinants of Voter Participation: A More General Model." <i>Public Choice</i> 27: 81-89.                                                                        | G     | US focus                              |
| 249 | Shachar, R., Nalebuff, B. 1999. "Follow the Leader: Theory and Evidence on Political Participation." <i>American Economic Review</i> 89(3): 525-47.                                                      | G     | US focus                              |
| 250 | Silberman, J., Durden, G.C., 1975. "The Rational Behaviour Theory of Voter Participation: The Evidence from Congressional Elections." <i>Public Choice</i> 23: 101-8.                                    | G     | US focus                              |
| 251 | Simonovits, G. & Rajk, L. 2012. "Competition and Turnout Revisited: The Importance of Measuring Expected Closeness Accurately." <i>Electoral Studies</i> 31(2): 364-71.                                  | CG; S | Hungary focus                         |
| 252 | Simpser, A. 2012. "Does Electoral Manipulation Discourage Voter Turnout? Evidence from Mexico." <i>Journal of Politics</i> 74(3): 782-95.                                                                | S     | Mexico focus                          |
| 253 | Sinclair, B., Hall, T. E. and R. M. Alvarez. 2011. "Flooding the Vote: Hurricane Katrina and Voter Participation in New Orleans." <i>American Politics Research</i> 39(5): 921-957.                      | S     | US focus                              |
| 254 | Smets, K. & van Ham, C., 2013. "The Embarrassment of Riches? A Meta-analysis of Individual-level Research on Voter Turnout." <i>Electoral Studies</i> 32: 344-59.                                        | CG    | Individual level                      |
| 255 | Smith, M.L. 2009. "The Inequality of Participation: Re-examining the Role of Social Stratification and Post-Communism on Political Participation in Europe." <i>Sociologicky Casopis</i> 45(3): 487-517. | S     | Individual-level analysis             |
| 256 | Smith, M.A., 2001. "The Contingent Effects of Ballot Initiatives and Candidate Races on Turnout." <i>American Journal of Political Science</i> 45(3): 700-6.                                             | G     | US focus                              |
| 257 | Søberg, M. & Tangeras, T.P. 2003. "Voter Turnout in Direct Democracy: Theory and Evidence." IUI working paper, 596, Stockholm.                                                                           | G     | Norway local elections; working paper |
| 258 | Söderlund, P., Wass, H. and Blais, A. 2011. "The Impact of Motivational and Contextual Factors on Turnout in First- and Second-order Elections." <i>Electoral Studies</i> 30(4): 689-99.                 | S     | EU election                           |

|     |                                                                                                                                                                                                                                                 |       |                        |
|-----|-------------------------------------------------------------------------------------------------------------------------------------------------------------------------------------------------------------------------------------------------|-------|------------------------|
| 259 | Solt, F. 2010. "Does Economic Inequality Depress Electoral Participation? Testing the Schattschneider Hypothesis." <i>Political Behavior</i> 32(2): 285–301.                                                                                    | S     | US focus               |
| 260 | Sørensen, R.J. 2017. "The Impact of State Television on Voter Turnout." <i>British Journal of Political Science</i> 49(1): 257-278.                                                                                                             | CG    | Norway local elections |
| 261 | Southwell, P.L. 2010. "A Panacea for Latino and Black Voters? Elevated Turnout in Vote by Mail Elections." <i>Social Science Journal</i> 47(4): 819-28.                                                                                         | S     | US focus               |
| 262 | Southwell, P.L. 2011. "Letting the Counties Decide: Voter Turnout and the All-Mail Option in the State of Washington." <i>Politics &amp; Policy</i> 39(6): 979-96.                                                                              | S     | US focus               |
| 263 | Southwell, P.L. 2010. "Voting Behavior in Vote-by-Mail Elections." <i>Analyses of Social Issues and Public Policy</i> 10(1): 106-15.                                                                                                            | S     | US focus               |
| 264 | Southwell, P.L. 2009. "Analysis of the Turnout Effects of Vote by Mail Elections, 1980-2007." <i>Social Science Journal</i> 46: 211-7.                                                                                                          | CG, S | US focus               |
| 265 | Springer, M.J. 2012. "State Electoral Institutions and Voter Turnout in Presidential Elections, 1920-2000." <i>State Politics and Policy Quarterly</i> 12(3): 252-283.                                                                          | CG, S | US focus               |
| 266 | Stein, R. M. & Vonnahme, G. 2012. "Effect of Election Day [US] Vote Centers on Voter Participation." <i>Election Law Journal</i> 11(3): 291-301.                                                                                                | S     | US focus               |
| 267 | Stockemer, D. & Calca, P. 2013. "Corruption and Turnout in Portugal—A Municipal Level Study." <i>Crime, Law and Social Change</i> 60: 535-48.                                                                                                   | CG    | Portugal focus         |
| 268 | Stockemer, D. & Parent, S. 2014. "The Inequality Turnout Nexus: New Evidence from Presidential Elections." <i>Politics &amp; Policy</i> 42(2): 221-45.                                                                                          | CG    | Presidential elections |
| 269 | Stokes, S.C., Dunning, T., Nazareno, M. and Brusco, V. 2013. <i>Brokers, Voters, and Clientelism: The Puzzle of Distributive Politics</i> . Cambridge: Cambridge University Press.                                                              | S     | Book                   |
| 270 | Streb, M.J. & Frederick, B. 2010. "When Money Cannot Encourage Participation: Campaign Spending and Rolloff in Low Visibility Judicial Elections." <i>Political Behavior</i> 33: 665-84.                                                        | CG    | US focus               |
| 271 | Tavares, A.F. & Carr, J.B. 2013. "So Close, Yet so Far Away? The Effects of City Size, Density and Growth on Local Civic Participation." <i>Journal of Urban Affairs</i> 35: 283-302.                                                           | CG    | Portugal focus         |
| 272 | Tolbert, C.J., Grummel, J.A., Smith, D.A. 2001. "The Effects of Ballot Initiatives on Voter Turnout in the American States." <i>American Politics Research</i> 29(6): 625-48.                                                                   | G     | US focus               |
| 273 | Trounstine, J. 2013. "Turnout and Incumbency in Local Elections." <i>Urban Affairs Reviews</i> 49: 167-89.                                                                                                                                      | CG, S | Cities                 |
| 274 | Tucker, H.J. 1986. "Contextual Models of Participation in US State Legislative Elections." <i>Western Political Quarterly</i> 39: 67-78.                                                                                                        | G     | US focus               |
| 275 | Ulbig, S. G. & Waggener, T. 2011. "Getting Registered and Getting to the Polls: The Impact of Voter Registration Strategy and Information Provision on Turnout of College Students." <i>PS: Political Science &amp; Politics</i> 44(3): 544-51. | S     | US focus               |

|     |                                                                                                                                                                                                                                            |       |                   |
|-----|--------------------------------------------------------------------------------------------------------------------------------------------------------------------------------------------------------------------------------------------|-------|-------------------|
| 276 | Wagner, M., Johann, D. and Kritzinger, S. 2012. "Voting at 16: Turnout and the Quality of Vote Choice." <i>Electoral Studies</i> 31(2): 372–83.                                                                                            | S     | Austria focus     |
| 277 | Wattenberg, M.P. 2005. "Elections: Turnout in the 2004 Presidential Election." <i>Presidential Studies Quarterly</i> 35(1): 138–46.                                                                                                        | S     | US focus          |
| 278 | Wilkinson, R. & Pickett, K. 2010. <i>The Spirit Level: Why Equality Is Better for Everyone</i> . London: Penguin Books.                                                                                                                    | CG    | Book              |
| 279 | Wirth, L. 1938. "Urbanism as a Way of Life." <i>American Journal of Sociology</i> 44: 1-24.                                                                                                                                                | CG    | US focus          |
| 280 | Wolfinger, R.E. & Rosenstone, S.J. 1980. <i>Who Votes?</i> New Haven: Yale University Press.                                                                                                                                               | S     | Book              |
| 281 | Wolfinger, R.E., Highton, B. and Mullin, M. 2005. "How Postregistration Laws Affect the Turnout of Citizens Registered to Vote." <i>State Politics and Policy Quarterly</i> 5(1): 1-23.                                                    | S     | US focus          |
| 282 | Wuffle, A., Brians, C.L. and Coulter, K. 2012. "Taking the Temperature: Implications for Adoption of Election Day Registration, State-Level Voter Turnout, and Life Expectancy." <i>PS: Political Science &amp; Politics</i> 45(1): 78-82. | S     | US focus          |
| 283 | Wuffle, A. 1984. "Should You Brush Your Teeth on November 6, 1984: A Rational Choice Perspective." <i>PS: Political Science &amp; Politics</i> 17: 577-81.                                                                                 | CG    | Theory focus      |
| 284 | Yamamura, E. 2011. "Effects of Social Norms and Fractionalization on Voting Behaviour in Japan." <i>Applied Economics</i> 43: 1,385-98.                                                                                                    | CG, S | Japan focus       |
| 285 | Zvulun, J. 2012. "The Single Transferable Vote and Voter Turnout in the 2004 Local Elections." <i>Journal of Political Marketing</i> 11(3): 123-42.                                                                                        | S     | New Zealand focus |

Note: CG= Cancela and Geys 2016; G= Geys 2006; S= Stockemer 2016

**Table A2a. Socioeconomic factors, summary statistics, democracies with election turnout data**

| Variable                                                     | Obs   | Mean   | St. dev. | Min    | Max    | Countries | Years     | Source              |
|--------------------------------------------------------------|-------|--------|----------|--------|--------|-----------|-----------|---------------------|
| GNI per capita, ln (constant 2010 USD) <sup>L,S</sup>        | 677   | 0.502  | 0.909    | -1.941 | 2.007  | 95        | 1960-2014 | World Bank          |
| Population (ln) <sup>L,S</sup>                               | 888   | 0.488  | 0.724    | -1.317 | 2.669  | 105       | 1960-2014 | World Bank          |
| GNI per capita growth <sup>L</sup>                           | 680   | 0.019  | 0.710    | -3.806 | 6.418  | 94        | 1962-2014 | World Bank          |
| Urban population (% total) <sup>L,S</sup>                    | 887   | 0.466  | 0.755    | -1.597 | 1.759  | 104       | 1960-2014 | World Bank          |
| GINI index <sup>L,S,I</sup>                                  | 426   | -0.033 | 1.058    | -2.065 | 2.561  | 93        | 1980-2014 | World Bank          |
| Population density, per sq. km land area (ln) <sup>L,S</sup> | 861   | 0.067  | 0.885    | -2.387 | 1.904  | 105       | 1962-2014 | World Bank          |
| Life expectancy (ave.) <sup>L,S</sup>                        | 885   | 0.639  | 0.708    | -2.119 | 1.758  | 105       | 1960-2014 | World Bank          |
| Ethnic fractionalization <sup>S</sup>                        | 1,000 | -0.356 | 0.877    | -1.664 | 1.823  | 104       | 1946-2014 | Alesina et al.      |
| Human development index <sup>S</sup>                         | 567   | 0.423  | 0.915    | -2.528 | 1.781  | 102       | 1990-2014 | UNDP                |
| Inflation <sup>L,S</sup>                                     | 832   | -0.001 | 0.947    | -4.258 | 4.821  | 102       | 1960-2014 | World Bank          |
| Unemployment <sup>L,S</sup>                                  | 671   | -0.036 | 0.915    | -1.285 | 6.468  | 88        | 1961-2014 | World Bank          |
| Revenue decentralization (ln) <sup>L,S</sup>                 | 262   | 0.282  | 0.920    | -4.160 | 1.578  | 58        | 1972-2001 | World Bank          |
| Spending decentralization (ln) <sup>L,S</sup>                | 262   | 0.359  | 0.835    | -2.185 | 1.428  | 59        | 1972-2001 | World Bank          |
| OECD member                                                  | 900   | 0.442  | 0.497    | 0      | 1      | 107       | 1961-2014 | Author              |
| Radios, per capita (ln) <sup>L,S</sup>                       | 659   | 0.639  | 0.723    | -3.141 | 1.936  | 91        | 1946-2004 | Banks               |
| Economic globalization <sup>L,S</sup>                        | 794   | 0.469  | 0.944    | -2.088 | 2.484  | 100       | 1970-2014 | KOF                 |
| Islam majority nation                                        | 867   | 0.058  | 0.2330   | 0      | 1      | 102       | 1950-2010 | Maoz                |
| Share of population aged 30-69                               | 402   | 66.351 | 4.060    | 57.673 | 76.377 | 23        | 1948-2007 | Steiner             |
| Linguistic fractionalization                                 | 984   | -0.277 | 0.861    | -1.310 | 1.821  | 102       | 1946-2014 | Alesina et al.      |
| Religious fractionalization                                  | 1,001 | 0.052  | 0.998    | -1.745 | 1.868  | 105       | 1946-2014 | Alesina et al.      |
| Union density                                                | 238   | 46.429 | 19.762   | 6.700  | 95.500 | 16        | 1950-2000 | Golden & Walrestein |
| <b>Location dummies</b>                                      |       |        |          |        |        |           |           |                     |
| Switzerland                                                  | 1,021 | 0.019  | 0.135    | 0      | 1      | 108       | 1944-2014 | Authors             |
| USA                                                          | 1,021 | 0.034  | 0.182    | 0      | 1      | 108       | 1944-2014 | Authors             |
| Latin America & Caribbean                                    | 1,021 | 0.198  | 0.399    | 0      | 1      | 108       | 1944-2014 | Authors             |
| Africa                                                       | 1,021 | 0.098  | 0.297    | 0      | 1      | 108       | 1944-2014 | Authors             |
| Asia                                                         | 1,021 | 0.112  | 0.315    | 0      | 1      | 108       | 1944-2014 | Authors             |
| Oceania                                                      | 1,021 | 0.058  | 0.233    | 0      | 1      | 108       | 1944-2014 | Authors             |
| West                                                         | 1,021 | 0.448  | 0.497    | 0      | 1      | 108       | 1944-2014 | Authors             |
| South America                                                | 1,021 | 0.420  | 0.494    | 0      | 1      | 108       | 1944-2014 | Authors             |
| Sweden                                                       | 1,021 | 0.019  | 0.138    | 0      | 1      | 108       | 1944-2014 | Authors             |
| New Zealand                                                  | 1,021 | 0.022  | 0.147    | 0      | 1      | 108       | 1944-2014 | Authors             |
| Norway                                                       | 1,021 | 0.017  | 0.128    | 0      | 1      | 108       | 1944-2014 | Authors             |
| Eastern Europe                                               | 1,021 | 0.101  | 0.318    | 0      | 1      | 108       | 1944-2014 | Authors             |

**Note:** <sup>L</sup> = lagged one year; <sup>S</sup> = standardized to a mean of 0 & SD of 1; <sup>I</sup> = interpolated. World Bank=World Bank (2017); Alesina et al.=Alesina et al. (2003) UNDP=UNDP (2017); Banks=Banks and Wilson (2017); KOF=Dreher, Gaston, and Martens (2008); Steiner= Steiner and Martin (2012); Maoz=Maoz and Henderson (2013).

**Table A2b. Socioeconomic factors, summary statistics, all countries**

| Variable                                                     | Obs    | Mean   | St. dev. | Min     | Max    | Countries | Years     | Source              |
|--------------------------------------------------------------|--------|--------|----------|---------|--------|-----------|-----------|---------------------|
| GNI per capita, ln (constant 2010 USD) <sup>L,S</sup>        | 5,135  | 0.000  | 1.000    | -2.291  | 2.148  | 185       | 1960-2016 | World Bank          |
| Population (ln) <sup>L,S</sup>                               | 10,856 | -0.004 | 1.000    | -2.9737 | 2.704  | 191       | 1960-2016 | World Bank          |
| GNI per capita growth <sup>L,S</sup>                         | 5,223  | 0.002  | 1.008    | -8.895  | 24.173 | 161       | 1962-2016 | World Bank          |
| Urban population (% total) <sup>L,S</sup>                    | 10,803 | -0.006 | 0.999    | -1.688  | 7.444  | 190       | 1960-2016 | World Bank          |
| GINI index <sup>L,S,I</sup>                                  | 2,759  | 0.000  | 1.000    | -2.589  | 2.743  | 161       | 1980-2016 | World Bank          |
| Population density, per sq. km land area (ln) <sup>L,S</sup> | 10,407 | -0.005 | 1.000    | -2.767  | 4.004  | 190       | 1962-2016 | World Bank          |
| Life expectancy (ave.) <sup>L,S</sup>                        | 10,279 | 0.000  | 1.000    | -3.812  | 1.803  | 187       | 1960-2016 | World Bank          |
| Ethnic fractionalization <sup>S</sup>                        | 10,184 | 0.000  | 1.000    | -1.671  | 1.907  | 187       | 1946-2015 | Alesina et al.      |
| Human development index <sup>S</sup>                         | 4,432  | 0.000  | 1.000    | -2.695  | 1.805  | 186       | 1990-2015 | UNDP                |
| Inflation <sup>L,S</sup>                                     | 7,005  | 0.012  | 0.961    | -6.660  | 6.002  | 174       | 1960-2016 | World Bank          |
| Unemployment <sup>L,S</sup>                                  | 3,952  | -0.002 | 1.002    | -1.285  | 8.000  | 184       | 1961-2016 | World Bank          |
| Revenue decentralization (ln) <sup>L,S</sup>                 | 1,465  | 0.000  | 1.000    | -4.160  | 1.948  | 102       | 1972-2001 | World Bank          |
| Spending decentralization (ln) <sup>L,S</sup>                | 1,453  | 0.000  | 1.000    | -2.706  | 1.769  | 101       | 1972-2001 | World Bank          |
| OECD member                                                  | 11,860 | 0.125  | 0.331    | 0       | 1      | 212       | 1961-2016 | Author              |
| Radios, per capita (ln) <sup>L,S</sup>                       | 7,403  | 0.000  | 1.000    | -4.269  | 2.761  | 194       | 1946-2004 | Banks               |
| Economic globalization <sup>L,S</sup>                        | 6,827  | 0.000  | 1.000    | -2.158  | 2.507  | 163       | 1970-2015 | KOF                 |
| Islam majority nation                                        | 8,715  | 0.220  | 0.410    | 0       | 1      | 198       | 1950-2010 | Maoz                |
| Share of population aged 30-69                               | 450    | 66.449 | 4.050    | 57.673  | 76.377 | 24        | 1948-2007 | Steiner             |
| Linguistic fractionalization                                 | 9,751  | 0.000  | 1.000    | -1.310  | 1.887  | 180       | 1946-2015 | Alesina et al.      |
| Religious fractionalization                                  | 10,238 | 0.000  | 1.000    | -1.756  | 1.868  | 189       | 1946-2015 | Alesina et al.      |
| Union density                                                | 783    | 45.545 | 19.230   | 5.700   | 96.700 | 17        | 1950-2000 | Golden & Walrestein |
| <b>Location dummies</b>                                      |        |        |          |         |        |           |           |                     |
| Switzerland                                                  | 15,203 | 0.005  | 0.071    | 0       | 1      | 212       | 1944-2016 | Authors             |
| USA                                                          | 15,203 | 0.005  | 0.070    | 0       | 1      | 212       | 1944-2016 | Authors             |
| Latin America & Caribbean                                    | 15,203 | 0.158  | 0.365    | 0       | 1      | 212       | 1944-2016 | Authors             |
| Africa                                                       | 15,203 | 0.258  | 0.437    | 0       | 1      | 212       | 1944-2016 | Authors             |
| Asia                                                         | 15,203 | 0.160  | 0.367    | 0       | 1      | 212       | 1944-2016 | Authors             |
| Oceania                                                      | 15,203 | 0.024  | 0.153    | 0       | 1      | 212       | 1944-2016 | Authors             |
| West                                                         | 15,203 | 0.137  | 0.344    | 0       | 1      | 212       | 1944-2016 | Authors             |
| South America                                                | 15,203 | 0.058  | 0.234    | 0       | 1      | 212       | 1944-2016 | Authors             |
| Sweden                                                       | 15,203 | 0.005  | 0.069    | 0       | 1      | 212       | 1944-2016 | Authors             |
| New Zealand                                                  | 15,203 | 0.005  | 0.069    | 0       | 1      | 212       | 1944-2016 | Authors             |
| Norway                                                       | 15,203 | 0.005  | 0.069    | 0       | 1      | 212       | 1944-2016 | Authors             |
| Eastern Europe                                               | 15,203 | 0.144  | 0.351    | 0       | 1      | 212       | 1944-2016 | Authors             |

*Note:* <sup>L</sup>= lagged one year; <sup>S</sup>= standardized to a mean of 0 & SD of 1; <sup>I</sup>= interpolated. World Bank=World Bank (2017); Alesina et al.=Alesina et al. (2003) UNDP=UNDP (2017); Banks=Banks and Wilson (2017); KOF=Dreher, Gaston, and Martens (2008); Steiner= Steiner and Martin (2012); Maoz=Maoz and Henderson (2013).

**Table A3a. Institutional factors, summary statistics, democracies with election turnout data**

| Variable                                                    | Obs.  | Mean   | St. dev. | Min.   | Max.   | Countries | Years     | Source        |
|-------------------------------------------------------------|-------|--------|----------|--------|--------|-----------|-----------|---------------|
| Compulsory voting                                           | 1,021 | 0.254  | 0.435    | 0      | 1      | 108       | 1945-2014 | IDEA          |
| Proportional representation                                 | 863   | 0.575  | 0.195    | 0      | 1      | 90        | 1945-2014 | Golder        |
| Concurrent election                                         | 957   | 0.166  | 0.372    | 0      | 1      | 107       | 1945-2014 | NELDA         |
| Effective number of political parties <sup>S</sup>          | 861   | -0.024 | 0.472    | -0.778 | 2.972  | 90        | 1945-2014 | Golder        |
| Effective number of political parties, squared <sup>S</sup> | 861   | -0.650 | 0.109    | -0.163 | 1.121  | 90        | 1945-2014 | Golder        |
| Unicameralism                                               | 1,005 | 0.435  | 0.496    | 0      | 1      | 107       | 1944-2014 | VDEM          |
| District magnitude <sup>S</sup>                             | 853   | 0.049  | 1.047    | -0.324 | 12.394 | 90        | 1945-2014 | Golder        |
| Automatic registration                                      | 840   | 0.750  | 0.433    | 0      | 1      | 101       | 1960-2012 | IAEP          |
| Federal system                                              | 842   | 0.385  | 0.487    | 0      | 1      | 101       | 1960-2012 | IAEP          |
| Plurality system                                            | 863   | 0.340  | 0.474    | 0      | 1      | 90        | 1945-2014 | Golder        |
| Majoritarian system                                         | 863   | 0.294  | 0.456    | 0      | 1      | 90        | 1945-2014 | Golder        |
| Female suffrage <sup>S</sup>                                | 643   | 0.478  | 0.363    | -1.970 | 0.592  | 91        | 1950-2000 | Paxton et al. |
| Mixed/Semi-presidential system                              | 863   | 0.123  | 0.328    | 0      | 1      | 90        | 1945-2014 | Golder        |
| Government fractionalization <sup>S</sup>                   | 682   | 0.243  | 1.020    | -0.697 | 2.611  | 101       | 1975-2012 | DPI           |
| Voting age                                                  | 427   | 19.293 | 1.512    | 18     | 25     | 23        | 1945-2008 | Steiner       |
| # seats in legislature (ln) <sup>S</sup>                    | 820   | 0.187  | 0.915    | -2.787 | 2.547  | 100       | 1960-2012 | IAEP          |

*Note:* <sup>L</sup>= lagged one year; <sup>S</sup>= standardized to a mean of 0 & SD of 1; <sup>I</sup>= interpolated. IDEA=International IDEA (2017); Golder=Boorman and Golder (2013); NELDA=Hyde and Marinov (2012); VDEM=Coppedge et al. (2017); IAEP=Wig, Hegre, and Regan (2015) & Regan, Frank, and Clark (2009); Paxton et al.=Paxton et al. (2003); DPI=Beck et al. (2001); Steiner= Steiner and Martin (2012).



**Table A3b. Institutional factors, summary statistics, all countries**

| Variable                                                    | Obs.   | Mean   | St. dev. | Min.   | Max.   | Countries | Years     | Source        |
|-------------------------------------------------------------|--------|--------|----------|--------|--------|-----------|-----------|---------------|
| Compulsory voting                                           | 2,064  | 0.234  | 0.424    | 0      | 1      | 186       | 1945-2014 | IDEA          |
| Proportional representation                                 | 1,341  | 0.506  | 0.500    | 0      | 1      | 132       | 1945-2016 | Golder        |
| Concurrent election                                         | 2,263  | 0.159  | 0.366    | 0      | 1      | 179       | 1945-2015 | NELDA         |
| Effective number of political parties <sup>S</sup>          | 1,264  | 0.000  | 1.000    | -0.778 | 14.937 | 128       | 1945-2016 | Golder        |
| Effective number of political parties, squared <sup>S</sup> | 1,264  | 0.000  | 1.000    | -0.163 | 19.976 | 128       | 1945-2016 | Golder        |
| Unicameralism                                               | 11,628 | 0.535  | 0.499    | 0      | 1      | 173       | 1944-2016 | VDEM          |
| District magnitude <sup>S</sup>                             | 1,318  | 0.000  | 1.000    | -0.324 | 12.394 | 131       | 1945-2016 | Golder        |
| Automatic registration                                      | 7,208  | 0.560  | 0.496    | 0      | 1      | 169       | 1960-2012 | IAEP          |
| Federal system                                              | 7,719  | 0.252  | 0.434    | 0      | 1      | 169       | 1960-2012 | IAEP          |
| Plurality system                                            | 1,341  | 0.412  | 0.492    | 0      | 1      | 132       | 1945-2016 | Golder        |
| Majoritarian system                                         | 1,341  | 0.374  | 0.484    | 0      | 1      | 132       | 1945-2016 | Golder        |
| Female suffrage <sup>S</sup>                                | 7,364  | 0.000  | 1.000    | -1.970 | 0.592  | 196       | 1950-2000 | Paxton et al. |
| Mixed/Semi-presidential system                              | 1,341  | 0.114  | 0.318    | 0      | 1      | 132       | 1945-2016 | Golder        |
| Government fractionalization <sup>S</sup>                   | 5,470  | 0.000  | 1.000    | -0.697 | 3.008  | 181       | 1975-2012 | DPI           |
| Voting age                                                  | 483    | 19.395 | 1.512    | 18     | 25     | 24        | 1945-2008 | Steiner       |
| # seats in legislature (ln) <sup>S</sup>                    | 6,819  | 0.000  | 1.000    | -2.787 | 3.340  | 168       | 1960-2012 | IAEP          |

*Note:* <sup>L</sup> = lagged one year; <sup>S</sup> = standardized to a mean of 0 & SD of 1; IDEA=International IDEA (2017); Golder=Boorman and Golder (2013); NELDA=Hyde and Marinov (2012); VDEM=Coppedge et al. (2017); IAEP=Wig, Hegre, and Regan (2015) & Regan, Frank, and Clark (2009); Paxton et al.=Paxton et al. (2003); DPI=Beck et al. (2001); Steiner=Steiner and Martin (2012).

**Table A4a. Political factors, summary statistics, democracies with election turnout data**

| Variable                                     | Obs   | Mean   | St. dev. | Min    | Max     | Countries | Years     | Source                        |
|----------------------------------------------|-------|--------|----------|--------|---------|-----------|-----------|-------------------------------|
| <b>Dependent variables and lagged DVs</b>    |       |        |          |        |         |           |           |                               |
| Voter turnout (% voters)                     | 999   | 72.224 | 15.405   | 2.730  | 99.200  | 108       | 1945-2014 | IDEA                          |
| Voter turnout (VAP)                          | 1,020 | 67.327 | 16.014   | 2.140  | 105.910 | 108       | 1945-2014 | IDEA                          |
| Previous turnout (# Voters)                  | 946   | 73.268 | 15.186   | 2.730  | 98.000  | 104       | 1946-2014 | IDEA                          |
| Previous turnout (VAP)                       | 972   | 67.807 | 16.319   | 2.140  | 105.910 | 104       | 1946-2014 | IDEA                          |
| Closeness/competitiveness <sup>S</sup>       | 900   | -0.344 | 0.584    | -0.928 | 3.139   | 104       | 1945-2015 | Author calculation using IDEA |
| Polity2 <sup>L,S</sup>                       | 1,013 | 1.037  | 0.343    | -1.318 | 1.242   | 107       | 1944-2014 | Polity                        |
| Quality of democracy                         | 793   | 0.494  | 0.500    | 0      | 1       | 105       | 1972-2014 | Freedom House                 |
| # elections held <sup>S</sup>                | 900   | 0.369  | 0.926    | -2.135 | 2.248   | 101       | 1945-2012 | NELDA                         |
| Short-term majority status of gov't          | 902   | -0.431 | 0.620    | -2.114 | 2.102   | 104       | 1945-2015 | Author calculation using IDEA |
| Opposition harassment                        | 891   | 0.046  | 0.210    | 0      | 1       | 101       | 1945-2012 | NELDA                         |
| Opposition ban                               | 900   | 0.033  | 0.180    | 0      | 1       | 101       | 1945-2012 | NELDA                         |
| Boycott                                      | 893   | 0.030  | 0.171    | 0      | 1       | 101       | 1945-2012 | NELDA                         |
| Violence                                     | 900   | 0.139  | 0.346    | 0      | 1       | 101       | 1945-2012 | NELDA                         |
| Time since previous election <sup>S</sup>    | 961   | -0.142 | 0.632    | -1.265 | 6.421   | 102       | 1946-2014 | NELDA                         |
| Cumulative electorate size (ln) <sup>S</sup> | 853   | 0.049  | 1.047    | -0.324 | 12.393  | 90        | 1945-2014 | IDEA                          |
| Linear time trend <sup>S</sup>               | 1,021 | 0.381  | 0.901    | -1.707 | 1.600   | 108       | 1944-2014 | Author calculation            |
| Cumulative executive responsiveness          | 842   | 0.790  | 0.407    | 0      | 1       | 101       | 1960-2012 | IAEP                          |
| <b>Time and election dummies</b>             |       |        |          |        |         |           |           |                               |
| 2 <sup>nd</sup> election                     | 900   | 0.049  | 0.216    | 0      | 1       | 101       | 1945-2012 | NELDA                         |
| 3 <sup>rd</sup> election                     | 900   | 0.043  | 0.204    | 0      | 1       | 101       | 1945-2012 | NELDA                         |
| 4 <sup>th</sup> election                     | 900   | 0.051  | 0.220    | 0      | 1       | 101       | 1945-2012 | NELDA                         |
| 3 <sup>rd</sup> & 4 <sup>th</sup> election   | 900   | 0.094  | 0.293    | 0      | 1       | 101       | 1945-2012 | NELDA                         |
| 5 <sup>th</sup> & 6 <sup>th</sup> election   | 900   | 0.110  | 0.313    | 0      | 1       | 101       | 1945-2012 | NELDA                         |
| 7 <sup>th</sup> & 8 <sup>th</sup> election   | 900   | 0.107  | 0.309    | 0      | 1       | 101       | 1945-2012 | NELDA                         |

*Note:* <sup>L</sup>= lagged one year; <sup>S</sup>= standardized.

**Table A4b. Political factors, summary statistics, all countries**

| Variable                                     | Obs    | Mean   | St. dev. | Min    | Max    | Countries | Years     | Source                        |
|----------------------------------------------|--------|--------|----------|--------|--------|-----------|-----------|-------------------------------|
| <b>Dependent variables and lagged DVs</b>    |        |        |          |        |        |           |           |                               |
| Voter turnout (% voters)                     | 1,879  | 71.677 | 16.152   | 2.73   | 102.62 | 185       | 1945-2014 | IDEA                          |
| Voter turnout (VAP)                          | 1,935  | 64.081 | 19.798   | 2.14   | 158.56 | 185       | 1945-2014 | IDEA                          |
| Previous turnout (# Voters)                  | 1,682  | 72.359 | 16.144   | 2.73   | 102.62 | 181       | 1946-2014 | IDEA                          |
| Previous turnout (VAP)                       | 1,738  | 64.48  | 19.804   | 2.14   | 158.56 | 182       | 1946-2014 | IDEA                          |
| Closeness/competitiveness <sup>S</sup>       | 1,694  | 0.000  | 1.000    | -0.928 | 3.937  | 168       | 1945-2015 | Author calculation using IDEA |
| Polity2 <sup>L,S</sup>                       | 9,700  | -0.008 | 1.000    | -1.453 | 1.242  | 179       | 1944-2016 | Polity                        |
| Quality of democracy                         | 8,862  | 0.226  | 0.418    | 0      | 1      | 200       | 1972-2016 | Freedom House                 |
| # elections held <sup>S</sup>                | 2,067  | 0.000  | 1.000    | -2.135 | 2.248  | 164       | 1945-2012 | NELDA                         |
| Short-term majority status of gov't          | 1,773  | 0.000  | 1.000    | -2.134 | 2.626  | 169       | 1945-2015 | Author calculation using IDEA |
| Opposition harassment                        | 1,885  | 0.176  | 0.381    | 0      | 1      | 164       | 1945-2012 | NELDA                         |
| Opposition ban                               | 2,067  | 0.213  | 0.409    | 0      | 1      | 164       | 1945-2012 | NELDA                         |
| Boycott                                      | 1,914  | 0.138  | 0.345    | 0      | 1      | 164       | 1945-2012 | NELDA                         |
| Violence                                     | 2,067  | 0.226  | 0.418    | 0      | 1      | 164       | 1945-2012 | NELDA                         |
| Time since previous election <sup>S</sup>    | 2,272  | 0.000  | 1.000    | -1.265 | 14.441 | 188       | 1946-2016 | NELDA                         |
| Cumulative electorate size (ln) <sup>S</sup> | 1,995  | 0.000  | 1.000    | -3.103 | 2.483  | 185       | 1945-2014 | IDEA                          |
| Linear time trend <sup>S</sup>               | 15,201 | 0.000  | 1.000    | -1.755 | 1.696  | 212       | 1944-2017 | Author calculation            |
| Cumulative executive responsiveness          | 7,719  | 0.635  | 0.481    | 0      | 1      | 169       | 1960-2012 | IAEP                          |
| <b>Time and election dummies</b>             |        |        |          |        |        |           |           |                               |
| 2 <sup>nd</sup> election                     | 2,067  | 0.077  | 0.267    | 0      | 1      | 164       | 1945-2012 | NELDA                         |
| 3 <sup>rd</sup> election                     | 2,067  | 0.075  | 0.264    | 0      | 1      | 164       | 1945-2012 | NELDA                         |
| 4 <sup>th</sup> election                     | 2,067  | 0.075  | 0.263    | 0      | 1      | 164       | 1945-2012 | NELDA                         |
| 3 <sup>rd</sup> & 4 <sup>th</sup> election   | 2,067  | 0.150  | 0.357    | 0      | 1      | 164       | 1945-2012 | NELDA                         |
| 5 <sup>th</sup> & 6 <sup>th</sup> election   | 2,067  | 0.144  | 0.351    | 0      | 1      | 164       | 1945-2012 | NELDA                         |
| 7 <sup>th</sup> & 8 <sup>th</sup> election   | 2,067  | 0.126  | 0.332    | 0      | 1      | 164       | 1945-2012 | NELDA                         |

*Note:* <sup>L</sup>= lagged one year; <sup>S</sup>= standardized.

**Table A5. Election sample—579 elections in 80 countries, 1945-2014**

| Country            | Elections | Election years                                                                                                               |
|--------------------|-----------|------------------------------------------------------------------------------------------------------------------------------|
| Albania            | 3         | 2005, 2009, 2013                                                                                                             |
| Argentina          | 15        | 1973, 1983, 1985, 1987, 1989, 1991, 1993, 1995, 1999, 2001, 2005, 2007, 2009, 2011, 2013                                     |
| Australia          | 21        | 1961, 1963, 1966, 1969, 1972, 1974, 1975, 1977, 1980, 1983, 1984, 1987, 1990, 1993, 1996, 1998, 2001, 2004, 2007, 2010, 2013 |
| Austria            | 13        | 1971, 1975, 1979, 1983, 1986, 1990, 1994, 1995, 1999, 2002, 2006, 2008, 2013                                                 |
| Bangladesh         | 4         | 1991, 1996 (Feb.), 1996 (June)                                                                                               |
| Belgium            | 14        | 1971, 1974, 1977, 1978, 1981, 1985, 1987, 1991, 1995, 1999, 2003, 2007, 2010, 2014                                           |
| Benin              | 5         | 1991, 1995, 1999, 2003, 2007                                                                                                 |
| Bolivia            | 8         | 1985, 1989, 1993, 1997, 2002, 2005, 2009, 2014                                                                               |
| Brazil             | 8         | 1986, 1990, 1994, 1998, 2002, 2006, 2010, 2014                                                                               |
| Bulgaria           | 8         | 1991, 1994, 1997, 2001, 2005, 2009, 2013, 2014                                                                               |
| Canada             | 13        | 1972, 1974, 1979, 1980, 1984, 1988, 1993, 1997, 2000, 2004, 2006, 2008, 2011                                                 |
| Colombia           | 17        | 1962, 1964, 1966, 1968, 1970, 1974, 1978, 1982, 1986, 1990, 1991, 1994, 1998, 2002, 2006, 2010, 2014                         |
| Croatia            | 4         | 2000, 2003, 2007, 2011                                                                                                       |
| Cyprus             | 6         | 1985, 1991, 1996, 2001, 2006, 2011                                                                                           |
| Czech Republic     | 6         | 1996, 1998, 2002, 2006, 2010, 2013                                                                                           |
| Denmark            | 16        | 1971, 1973, 1975, 1977, 1979, 1981, 1984, 1987, 1988, 1990, 1994, 1998, 2001, 2005, 2007, 2011                               |
| Dominican Republic | 6         | 1986, 1990, 1998, 2002, 2006, 2010                                                                                           |
| Ecuador            | 10        | 1979, 1984, 1986, 1988, 1990, 1994, 1996, 1998, 2002, 2006                                                                   |
| El Salvador        | 9         | 1985, 1988, 1991, 1994, 1997, 2000, 2003, 2006, 2009                                                                         |
| Estonia            | 3         | 2003, 2007, 2011                                                                                                             |
| Finland            | 12        | 1970, 1972, 1975, 1979, 1983, 1987, 1991, 1995, 1999, 2003, 2007, 2011                                                       |
| France             | 10        | 1973, 1978, 1981, 1986, 1988, 1996, 1997, 2002, 2007, 2012                                                                   |
| Germany            | 7         | 1990, 1994, 1998, 2002, 2005, 2009, 2013                                                                                     |
| Ghana              | 2         | 2008, 2012                                                                                                                   |
| Greece             | 13        | 1977, 1981, 1985, 1989 (June), 1989 (Nov.), 1993, 1996, 2000, 2004, 2007, 2009, 2012 (May), 2012 (June)                      |
| Guatemala          | 4         | 1999, 2003, 2007, 2011                                                                                                       |
| Guinea-Bissau      | 2         | 2008, 2014                                                                                                                   |
| Honduras           | 7         | 1989, 1993, 1997, 2001, 2005, 2009, 2013                                                                                     |
| Hungary            | 6         | 1994, 1998, 2002, 2006, 2010, 2014                                                                                           |
| India              | 14        | 1962, 1967, 1971, 1977, 1980, 1984, 1989, 1991, 1996, 1998, 1999, 2004, 2009, 2014                                           |
| Indonesia          | 1         | 2014                                                                                                                         |
| Ireland            | 4         | 1997, 2002, 2007, 2011                                                                                                       |
| Israel             | 11        | 1973, 1977, 1981, 1984, 1988, 1992, 1996, 1999, 2003, 2006, 2009                                                             |
| Italy              | 12        | 1972, 1976, 1979, 1983, 1987, 1992, 1994, 1996, 2001, 2006, 2008, 2013                                                       |
| Jamaica            | 1         | 2011                                                                                                                         |
| Japan              | 15        | 1972, 1976, 1979, 1980, 1983, 1986, 1990, 1993, 1996, 2000, 2003, 2005, 2009, 2012, 2014                                     |
| Kenya              | 2         | 2002, 2007                                                                                                                   |
| Latvia             | 6         | 1998, 2002, 2006, 2010, 2011, 2014                                                                                           |
| Liberia            | 1         | 2011                                                                                                                         |
| Lithuania          | 2         | 2008, 2012                                                                                                                   |
| Luxembourg         | 9         | 1974, 1979, 1984, 1989, 1994, 1999, 2004, 2009, 2013                                                                         |
| Macedonia          | 7         | 1994, 1998, 2002, 2006, 2008, 2011, 2014                                                                                     |
| Madagascar         | 3         | 1993, 1998, 2002                                                                                                             |
| Malawi             | 3         | 2004, 2009, 2014                                                                                                             |

|                     |            |                                                                                                                                    |
|---------------------|------------|------------------------------------------------------------------------------------------------------------------------------------|
| Mali                | 4          | 1992, 1997, 2002, 2007                                                                                                             |
| Mauritius           | 2          | 2010, 2014                                                                                                                         |
| Mexico              | 5          | 2000, 2003, 2006, 2009, 2012                                                                                                       |
| Moldova             | 7          | 1998, 2001, 2005, 2009 (April), 2009 (July), 2010, 2014                                                                            |
| Mongolia            | 1          | 2012                                                                                                                               |
| Netherlands         | 14         | 1971, 1972, 1977, 1981, 1982, 1986, 1989, 1994, 1998, 2002, 2003, 2006, 2010, 2012                                                 |
| New Zealand         | 6          | 1999, 2002, 2005, 2008, 2011, 2014                                                                                                 |
| Nicaragua           | 5          | 1990, 1996, 2001, 2006, 2011                                                                                                       |
| Nigeria             | 1          | 1983                                                                                                                               |
| Norway              | 9          | 1981, 1985, 1989, 1993, 1997, 2001, 2005, 2009, 2013                                                                               |
| Pakistan            | 5          | 1988, 1990, 1993, 1997, 2013                                                                                                       |
| Panama              | 5          | 1994, 1999, 2004, 2009, 2014                                                                                                       |
| Paraguay            | 4          | 1998, 2003, 2008, 2013                                                                                                             |
| Peru                | 6          | 1980, 1985, 1990, 2001, 2006, 2011                                                                                                 |
| Philippines         | 10         | 1987, 1992, 1995, 1998, 2001, 2004, 2007, 2010, 2013, 2014                                                                         |
| Poland              | 3          | 2005, 2007, 2011                                                                                                                   |
| Portugal            | 13         | 1976, 1979, 1980, 1983, 1985, 1987, 1991, 1995, 1999, 2002, 2005, 2009, 2011                                                       |
| Romania             | 5          | 1996, 2000, 2004, 2008, 2012                                                                                                       |
| Senegal             | 3          | 2001, 2007, 2012                                                                                                                   |
| Sierra Leone        | 2          | 2007, 2012                                                                                                                         |
| Slovakia            | 3          | 2006, 2010, 2012                                                                                                                   |
| Slovenia            | 3          | 2008, 2011, 2014                                                                                                                   |
| South Korea         | 7          | 1988, 1992, 1996, 2000, 2004, 2008, 2012                                                                                           |
| Spain               | 10         | 1979, 1982, 1986, 1989, 1993, 1996, 2000, 2004, 2008, 2011                                                                         |
| Sri Lanka           | 4          | 1965, 1970, 1977, 2001                                                                                                             |
| Sweden              | 13         | 1973, 1976, 1979, 1982, 1985, 1988, 1991, 1994, 1998, 2002, 2006, 2010, 2014                                                       |
| Switzerland         | 8          | 1983, 1987, 1991, 1995, 1999, 2003, 2007, 2011                                                                                     |
| Thailand            | 7          | 1992 (Mar.), 1992 (Sept.), 1995, 1996, 2001, 2005, 2011                                                                            |
| Timor Leste         | 1          | 2007                                                                                                                               |
| Trinidad and Tobago | 12         | 1966, 1971, 1976, 1981, 1986, 1991, 1995, 2000, 2001, 2002, 2007, 2010                                                             |
| Turkey              | 6          | 1991, 1995, 1999, 2002, 2007, 2011                                                                                                 |
| Ukraine             | 6          | 1994, 1998, 2002, 2006, 2007, 2012                                                                                                 |
| United Kingdom      | 10         | 1974 (Feb), 1974 (Oct), 1979, 1983, 1987, 1992, 1997, 2001, 2005, 2010                                                             |
| Uruguay             | 7          | 1966, 1989, 1994, 1999, 2004, 2009, 2014                                                                                           |
| USA                 | 22         | 1972, 1974, 1976, 1978, 1980, 1982, 1984, 1986, 1988, 1990, 1992, 1994, 1996, 1998, 2000, 2002, 2004, 2006, 2008, 2010, 2012, 2014 |
| Venezuela           | 7          | 1978, 1983, 1988, 1993, 1998, 2000, 2005                                                                                           |
| <b>TOTAL</b>        | <b>579</b> |                                                                                                                                    |

**Note:** International IEA does not clearly mark which round of multi-round parliamentary contests is captured in voter turnout. We compare the International IDEA data with other sources including country-level official sources as well as Dieter Nohlen's election data handbooks (e.g., Nohlen et al. 2001; Nohlen 2005). There are twenty-eight countries that included second round elections for legislative seats between 1945 and 2014—Albania, Belarus, Central African Republic, Chad, Comoros Islands, Congo, Cuba, Czech Republic, Egypt, France, Gabon, Haiti, Iran, Israel, Ivory Coast, Kiribati, Kyrgyzstan, Lithuania, Mali, Mauritania, Moldova, Monaco, North Macedonia, Poland, Tajikistan, Togo, Ukraine, and Uzbekistan. Of these twenty-eight states, eight (Albania, France, Israel, Lithuania, Mali, Moldova, Poland, and Ukraine) are included in the analysis.

We have individually assessed each of the elections in these eight in the dataset. Three of these eight countries (Albania, Moldova and Poland) relied on second round elections that were not included our analysis. For example, Poland had second round just for 1989 as did Moldova in 1990. For Lithuania and Mali, IDEA consistently reports the results of the first round. For France, IDEA includes the results of the second round of the 2002, 2007 and 2012. The difference between first and second round in 2002 is 4 points, in 2007 it is 0.44

points, and in 2012, it was 2 points. For 1978 and 1986, it is not possible to determine which round was reported by IDEA with the available data sources at our disposal. For the rest of the French elections included, the information provided by IDEA is for the first round. Israel included the possibility of a second round in the prime ministerial elections of 1996, 1999 and 2001 if no candidates obtained 50%. However, in these three elections, the victories of Netanyahu, Barak and Sharon in the first round of the 1996, 1999 and 2001 elections respectively made a second round unnecessary. We include the turnout results for the 1996 and 1999 Knesset lower house elections, so this does not apply. The 2001 election for the Prime Minister is not included. Finally, the differences in turnout between the two offices in the two elections that were held simultaneously (1996 and 1999), is less than 0.05 points. Finally, the Ukraine implemented second round elections between 1990 and 1994. We include the 1994 election in our analysis and IDEA reports the second-round results.

To summarize, of the eight countries that we include that could have second round elections: three (Albania, Moldova and Poland) are outside the scope of our analysis; three rely on first round data (Lithuania, Mali and Israel); one (Ukraine) relies on second round data; one (France) does not apply a consistent criterion. In this case the most important difference is of four percentage points between the first and the second round in one election. Scholars can choose to exclude this election from their analysis if this difference poses a potential problem. Finally, given that none of our independent variables are round-specific, we do not believe that these few inconsistencies would have created a mismatch when merging at the country-year or election levels.

**Table A6. Series of models run**

| <b>Model series</b>                                                          | <b>Results table</b> | <b>Regressions</b> |
|------------------------------------------------------------------------------|----------------------|--------------------|
| Registered voters, fixed effects, lagged DV, democracies                     | Table A7             | 1,170,324          |
| Registered voters, random effects, lagged DV, democracies                    | Table A8             | 2,956,512          |
| Registered voters, fixed effects, no lagged DV, democracies                  | Table A9             | 1,171,092          |
| Registered voters, random effects, no lagged DV, democracies                 | Table A10            | 611,080            |
| Registered voters, robust standard errors, lagged DV, democracies            | Table A11            | 2,433,115          |
| Registered voters, robust standard errors, no lagged DV, democracies         | Table A12            | 2,446,308          |
| Voting aged population, robust standard errors, no lagged DV, democracies    | Table A13            | 2,376,619          |
| Registered voters, robust standard errors, no lagged DV, autocracies         | Table A14            | 2,454,518          |
| Registered voters, robust standard errors, no lagged DV, time squared        |                      | 41,664             |
| Registered voters, robust standard errors, no lagged DV, time cubed          |                      | 41,664             |
| Registered voters, robust standard errors, no lagged DV, rich countries      |                      | 41,664             |
| Registered voters, robust standard errors, no lagged DV, poor countries      |                      | 23,426             |
| Registered voters, robust standard errors, no lagged DV, Western countries   |                      | 41,664             |
| Registered voters, robust standard errors, no lag. DV, non-Western countries |                      | 24,804             |
| Registered voters, robust standard errors, no lag. DV, new democracies       |                      | 22,100             |
| Registered voters, robust standard errors, no lag. DV, old democracies       |                      | 39,711             |
| <b>TOTAL</b>                                                                 |                      | <b>15,896,265</b>  |

**Table A7. Registered voters with fixed effects and lagged DV—complete results**

| <i>Variable</i>                           | <i>LB</i>  | <i>Leamer</i> |               | <i>Sala-i-Martin</i> |                 | <i>Robust</i> |
|-------------------------------------------|------------|---------------|---------------|----------------------|-----------------|---------------|
|                                           |            | <i>UB</i>     | <i>Robust</i> | <i>CDF&lt;0</i>      | <i>CDF&gt;0</i> |               |
| # elections held                          | -21.530    | 12.493        |               | 0.827                | 0.173           |               |
| # seats in legislature (ln)               | -10.459    | 17.994        |               | 0.109                | 0.891           |               |
| 1945-1994 time period                     | -0.230     | 3.697         |               | 0.043                | 0.957           | Robust        |
| Ban                                       | -0.742     | 5.093         |               | 0.095                | 0.905           |               |
| Boycott                                   | -10.446    | 3.138         |               | 0.871                | 0.129           |               |
| Closeness/competitiveness                 | -3.958     | 0.682         |               | 0.975                | 0.025           | Robust        |
| Compulsory voting                         | -7.301     | 24.551        |               | 0.164                | 0.836           |               |
| Concurrent election                       | -2.744     | 23.039        |               | 0.007                | 0.993           | Robust        |
| Cumulative executive responsiveness       | -5.432     | 7.103         |               | 0.246                | 0.754           |               |
| District Magnitude                        | -83.671    | 89.522        |               | 0.665                | 0.335           |               |
| Economic globalization                    | -7.914     | -0.623        | Robust        | 0.998                | 0.002           | Robust        |
| Eff. # political parties (Golder)         | -5.693     | 6.693         |               | 0.255                | 0.745           |               |
| Eff. # political parties Squared (Golder) | -41.310    | 49.856        |               | 0.100                | 0.900           |               |
| Federal system                            | -5.735     | 4.412         |               | 0.724                | 0.276           |               |
| Female suffrage                           | -148.082   | 122.073       |               | 0.859                | 0.141           |               |
| Fifth or sixth election                   | -3.734     | 2.497         |               | 0.615                | 0.385           |               |
| Fourth election                           | -6.248     | 4.572         |               | 0.445                | 0.555           |               |
| GINI index                                | -32.793    | 16.978        |               | 0.906                | 0.094           |               |
| GNI per capita growth                     | -1.290     | 0.931         |               | 0.598                | 0.402           |               |
| GNI per capita, ln (const. 2010 USD)      | -35.559    | 11.528        |               | 0.908                | 0.092           |               |
| Government fractionalization              | -0.799     | 0.862         |               | 0.446                | 0.554           |               |
| Harassment                                | -2.747     | 3.236         |               | 0.378                | 0.622           |               |
| Inflation                                 | -0.476     | 2.252         |               | 0.029                | 0.971           | Robust        |
| Life expectancy (ave.)                    | -30.084    | 40.416        |               | 0.258                | 0.742           |               |
| Majoritarian system                       | -11.307    | 8.896         |               | 0.453                | 0.547           |               |
| Majority status of gov't                  | -4.411     | 3.974         |               | 0.504                | 0.496           |               |
| Mixed/Semi-presidential system            | -10.803    | 10.217        |               | 0.677                | 0.323           |               |
| OECD member                               | -12.289    | 7.109         |               | 0.691                | 0.309           |               |
| Plurality system                          | -9.377     | 5.228         |               | 0.730                | 0.270           |               |
| Polity2                                   | -21.858    | 21.591        |               | 0.480                | 0.520           |               |
| Population density                        | -9,539.062 | 9,282.554     |               | 0.571                | 0.429           |               |
| Population, ln                            | -3,645.309 | 3,650.211     |               | 0.658                | 0.342           |               |
| Previous turnout                          | -0.589     | 0.476         |               | 0.429                | 0.571           |               |
| Proportional representation               | -1.447     | 11.804        |               | 0.026                | 0.974           | Robust        |
| Quality of democracy                      | -3.997     | 3.685         |               | 0.412                | 0.588           |               |
| Radios, per capita, ln                    | -27.614    | 34.049        |               | 0.220                | 0.780           |               |
| Revenue decentralization                  | -16.044    | 14.856        |               | 0.743                | 0.257           |               |
| Second election                           | -12.752    | 7.461         |               | 0.759                | 0.241           |               |
| Seventh or eighth election                | -4.540     | 3.725         |               | 0.706                | 0.294           |               |
| Share age 30-69 of VAP                    | -0.819     | 0.577         |               | 0.783                | 0.217           |               |
| Spending decentralization                 | -13.002    | 22.544        |               | 0.032                | 0.968           | Robust        |
| Suffrage                                  | -4.551     | 0.517         |               | 0.964                | 0.036           | Robust        |
| Third election                            | -3.321     | 3.815         |               | 0.546                | 0.454           |               |
| Third or fourth election                  | -3.346     | 2.847         |               | 0.521                | 0.479           |               |
| Time since previous election              | -1.266     | 1.713         |               | 0.362                | 0.638           |               |
| Time trend                                | -24.596    | 10.865        |               | 0.987                | 0.013           | Robust        |
| Unemployment                              | -4.671     | 2.787         |               | 0.839                | 0.161           |               |
| Unicameralism                             | -11.813    | 2.984         |               | 0.950                | 0.050           |               |
| Union density                             | -0.990     | 0.901         |               | 0.274                | 0.726           |               |
| Unionization                              | -0.429     | 0.275         |               | 0.839                | 0.161           |               |
| Urban population (% total)                | -36.918    | 18.391        |               | 0.930                | 0.070           |               |
| Violence                                  | -4.179     | 3.324         |               | 0.780                | 0.220           |               |
| Voting age                                | -4.119     | 2.947         |               | 0.813                | 0.187           |               |

Note: Results from 22,096 regressions including each of the 53 questionable variables. Core five variable results from 1,170,324 models.



**Table A8. Registered voters with random effects and lagged DV—complete results**

| Variable                                  | Leamer   |         |        | Sala-i-Martin |       |        |
|-------------------------------------------|----------|---------|--------|---------------|-------|--------|
|                                           | LB       | UB      | Robust | CDF<0         | CDF>0 | Robust |
| # elections held                          | -7.893   | 6.173   |        | 0.776         | 0.224 |        |
| # seats in legislature (ln)               | -3.965   | 5.059   |        | 0.228         | 0.772 |        |
| 2nd election                              | -8.804   | -3.421  | Robust | 0.998         | 0.002 | Robust |
| 3rd election                              | -6.112   | 9.552   |        | 0.368         | 0.632 |        |
| 3rd & 4th election                        | -2.002   | 3.826   |        | 0.140         | 0.860 |        |
| 4th election                              | -9.156   | 7.673   |        | 0.249         | 0.751 |        |
| 5th & 6th election                        | -0.834   | 4.055   |        | 0.057         | 0.944 |        |
| 7th & 8th                                 | -4.874   | 3.340   |        | 0.768         | 0.232 |        |
| 1945-1994 time period                     | -0.790   | 4.168   |        | 0.085         | 0.915 |        |
| Africa                                    | -2.873   | 8.619   |        | 0.261         | 0.739 |        |
| Asia                                      | -0.831   | 5.940   |        | 0.059         | 0.941 |        |
| Ban                                       | -1.841   | 2.743   |        | 0.283         | 0.717 |        |
| Boycott                                   | -9.966   | 4.376   |        | 0.794         | 0.206 |        |
| Closeness/competitiveness                 | -3.516   | 1.002   |        | 0.912         | 0.088 |        |
| Compulsory voting                         | -14.350  | 24.092  |        | 0.003         | 0.997 | Robust |
| Concurrent election                       | -6.138   | 21.897  |        | 0.000         | 1.000 | Robust |
| Cumulative executive responsiveness       | -21.308  | 22.714  |        | 0.324         | 0.676 |        |
| District Magnitude                        | -0.663   | 1.157   |        | 0.305         | 0.695 |        |
| Eastern Europe                            | -7.315   | -1.602  | Robust | 0.992         | 0.008 | Robust |
| Economic globalization                    | -3.534   | 1.071   |        | 0.923         | 0.077 |        |
| Eff. # political parties (Golder)         | -5.974   | 4.830   |        | 0.578         | 0.422 |        |
| Eff. # political parties Squared (Golder) | -41.719  | 39.881  |        | 0.367         | 0.633 |        |
| Ethnic fractionalization                  | -27.173  | 23.389  |        | 0.987         | 0.013 | Robust |
| Federal system                            | -2.149   | 3.456   |        | 0.194         | 0.806 |        |
| Female suffrage                           | -157.549 | 151.631 |        | 0.781         | 0.219 |        |
| GINI index                                | -19.932  | 11.455  |        | 0.989         | 0.011 | Robust |
| GNI per capita growth                     | -9.930   | 9.498   |        | 0.246         | 0.754 |        |
| GNI per capita, ln (const. 2010 USD)      | -12.755  | 11.460  |        | 0.311         | 0.689 |        |
| Government fractionalization              | -1.488   | 1.560   |        | 0.261         | 0.739 |        |
| Harassment                                | -1.783   | 3.114   |        | 0.284         | 0.716 |        |
| Human development index                   | -4.653   | 4.799   |        | 0.496         | 0.504 |        |
| Inflation                                 | 0.069    | 1.860   | Robust | 0.010         | 0.990 | Robust |
| Islamic majority nation                   | -2.397   | 2.703   |        | 0.414         | 0.586 |        |
| Latin America & Caribbean                 | -8.645   | -1.026  | Robust | 0.992         | 0.008 | Robust |
| Life expectancy (ave.)                    | -11.394  | 8.933   |        | 0.822         | 0.178 |        |
| Linguistic fractionalization              | -20.206  | 20.352  |        | 0.239         | 0.761 |        |
| Majoritarian system                       | -4.108   | 7.751   |        | 0.240         | 0.760 |        |
| Majority status of gov't                  | -2.688   | 3.927   |        | 0.305         | 0.695 |        |
| Mixed/Semi-presidential system            | -8.598   | 3.182   |        | 0.793         | 0.207 |        |
| Norway                                    | -0.573   | 4.765   | Robust | 0.035         | 0.965 | Robust |
| New Zealand                               | 0.868    | 9.256   | Robust | 0.041         | 0.959 | Robust |
| Oceania                                   | -2.381   | 15.491  |        | 0.002         | 0.998 | Robust |
| OECD member                               | -1.883   | 4.789   |        | 0.151         | 0.849 |        |
| Plurality system                          | -10.268  | 8.676   |        | 0.442         | 0.558 |        |
| Polity2                                   | -9.571   | 14.096  |        | 0.096         | 0.904 |        |
| Population density                        | -3.659   | 3.291   |        | 0.655         | 0.345 |        |
| Population, ln                            | -14.270  | 11.329  |        | 0.928         | 0.072 |        |
| Previous turnout                          | 0.322    | 0.942   | Robust | 0.008         | 0.992 | Robust |
| Proportional representation               | -3.045   | 4.645   |        | 0.246         | 0.754 |        |
| Quality of democracy                      | -0.377   | 4.068   |        | 0.078         | 0.922 |        |
| Radios, per capita, ln                    | -12.490  | 10.807  |        | 0.777         | 0.223 |        |
| Religious fractionalization               | -39.821  | 42.886  |        | 0.051         | 0.949 |        |
| Revenue decentralization                  | -5.669   | 6.718   |        | 0.130         | 0.870 |        |
| Share age 30-69 of VAP                    | -0.308   | 0.380   |        | 0.226         | 0.774 |        |
| South America                             | -4.578   | 1.906   |        | 0.858         | 0.142 |        |
| Spending decentralization                 | -6.164   | 8.152   |        | 0.050         | 0.950 |        |
| Suffrage                                  | -2.299   | 2.958   |        | 0.386         | 0.614 |        |
| Sweden                                    | 2.009    | 8.816   | Robust | 0.003         | 0.997 | Robust |
| Switzerland                               | -21.285  | -3.543  | Robust | 1.000         | 0.000 | Robust |
| Time since previous election              | -1.721   | 1.512   |        | 0.647         | 0.353 |        |
| Time trend                                | -7.252   | 2.213   |        | 0.938         | 0.062 |        |
| Unemployment                              | -2.891   | 1.109   |        | 0.887         | 0.113 |        |

|                            |         |        |       |       |
|----------------------------|---------|--------|-------|-------|
| Unicameralism              | -1.575  | 2.734  | 0.220 | 0.780 |
| Union density              | -0.552  | 0.603  | 0.051 | 0.949 |
| Unionization               | -0.264  | 0.302  | 0.081 | 0.919 |
| Urban population (% total) | -18.455 | 17.997 | 0.488 | 0.512 |
| USA                        | -23.433 | 21.583 | 0.712 | 0.288 |
| Violence                   | -3.678  | 1.834  | 0.880 | 0.120 |
| Voting age                 | -1.322  | 1.358  | 0.565 | 0.435 |
| West                       | -1.188  | 11.903 | 0.129 | 0.871 |

Note: Results from 41,660 regressions including each of the 65 questionable variables. Core five variable results from 2,956,512 models.

**Table A9. Registered voters with fixed effects without lagged DV—complete results**

| <i>Variable</i>                           | <i>LB</i>  | <i>Leamer</i> |               | <i>Sala-i-Martin</i> |                 |               |
|-------------------------------------------|------------|---------------|---------------|----------------------|-----------------|---------------|
|                                           |            | <i>UB</i>     | <i>Robust</i> | <i>CDF&lt;0</i>      | <i>CDF&gt;0</i> | <i>Robust</i> |
| # elections held                          | -29.103    | 6.712         |               | 0.863                | 0.137           |               |
| # seats in legislature (ln)               | -8.630     | 17.699        |               | 0.057                | 0.943           |               |
| 1945-1994 time period                     | -0.038     | 3.905         |               | 0.041                | 0.959           | Robust        |
| Ban                                       | -1.066     | 6.328         |               | 0.099                | 0.901           |               |
| Boycott                                   | -13.309    | 6.252         |               | 0.881                | 0.119           |               |
| Closeness/competitiveness                 | -5.530     | 1.318         |               | 0.990                | 0.011           | Robust        |
| Compulsory voting                         | -8.180     | 26.276        |               | 0.159                | 0.841           |               |
| Concurrent election                       | 0.207      | 18.265        | Robust        | 0.001                | 0.999           | Robust        |
| Cumulative executive responsiveness       | -6.883     | 6.822         |               | 0.242                | 0.758           |               |
| District magnitude                        | -80.150    | 83.004        |               | 0.307                | 0.693           |               |
| Economic globalization                    | -7.801     | -1.071        | Robust        | 0.999                | 0.001           | Robust        |
| Eff. # political parties (Golder)         | -10.690    | 10.898        |               | 0.443                | 0.557           |               |
| Eff. # political parties Squared (Golder) | -80.051    | 85.807        |               | 0.234                | 0.766           |               |
| Federal system                            | -5.802     | 3.834         |               | 0.807                | 0.193           |               |
| Female suffrage                           | -155.397   | 137.676       |               | 0.849                | 0.151           |               |
| Fifth or sixth election                   | -2.717     | 1.684         |               | 0.762                | 0.238           |               |
| Fourth election                           | -7.916     | 4.897         |               | 0.545                | 0.455           |               |
| GINI index                                | -28.198    | 19.061        |               | 0.864                | 0.136           |               |
| GNI per capita growth                     | -1.672     | 0.460         |               | 0.957                | 0.043           | Robust        |
| GNI per capita, ln (const. 2010 USD)      | -34.679    | 11.827        |               | 0.907                | 0.093           |               |
| Government fractionalization              | -0.816     | 1.034         |               | 0.296                | 0.704           |               |
| Harassment                                | -3.348     | 2.659         |               | 0.526                | 0.474           |               |
| Human development index                   | -62.124    | 46.178        |               | 0.885                | 0.115           |               |
| Inflation                                 | -1.059     | 2.836         |               | 0.029                | 0.971           | Robust        |
| Life expectancy (ave.)                    | -20.073    | 29.837        |               | 0.233                | 0.767           |               |
| Majoritarian system                       | -7.922     | 6.904         |               | 0.497                | 0.503           |               |
| Majority status of gov't                  | -8.864     | 8.075         |               | 0.359                | 0.641           |               |
| Mixed/Semi-presidential system            | -9.532     | 7.765         |               | 0.716                | 0.284           |               |
| OECD member                               | -11.755    | 6.712         |               | 0.689                | 0.311           |               |
| Plurality system                          | -8.418     | 3.415         |               | 0.847                | 0.153           |               |
| Polity2                                   | -16.354    | 13.857        |               | 0.778                | 0.222           |               |
| Population density                        | -9,629.190 | 9,333.363     |               | 0.833                | 0.167           |               |
| Population, ln                            | -3,666.242 | 3,681.118     |               | 0.616                | 0.384           |               |
| Proportional representation               | -0.045     | 11.466        |               | 0.020                | 0.980           | Robust        |
| Quality of democracy                      | -2.604     | 2.884         |               | 0.385                | 0.615           |               |
| Radios, per capita, ln                    | -20.487    | 22.398        |               | 0.311                | 0.689           |               |
| Revenue decentralization                  | -15.563    | 20.467        |               | 0.187                | 0.813           |               |
| Second election                           | -12.125    | 8.919         |               | 0.441                | 0.559           |               |
| Seventh or eighth election                | -4.008     | 1.791         |               | 0.783                | 0.217           |               |
| Share age 30-69 of VAP                    | -0.841     | 0.698         |               | 0.733                | 0.267           |               |
| Spending decentralization                 | -12.897    | 25.783        |               | 0.018                | 0.982           | Robust        |
| Suffrage                                  | -4.338     | 0.812         |               | 0.914                | 0.086           |               |
| Third election                            | -28.080    | 14.916        |               | 0.980                | 0.020           | Robust        |
| Third or fourth election                  | -5.831     | 3.046         |               | 0.847                | 0.153           |               |
| Time since previous election              | -13.297    | 1.930         |               | 0.959                | 0.041           | Robust        |
| Time trend                                | -1.722     | 2.027         |               | 0.231                | 0.769           |               |
| Unemployment                              | -0.517     | 0.454         |               | 0.504                | 0.496           |               |
| Unicameralism                             | -30.705    | 12.108        |               | 0.936                | 0.064           |               |
| Union density                             | -4.515     | 3.253         |               | 0.738                | 0.262           |               |
| Unionization                              | -28.080    | 14.916        |               | 0.980                | 0.020           | Robust        |
| Urban population (% total)                | -5.831     | 3.046         |               | 0.847                | 0.153           |               |
| Violence                                  | -13.297    | 1.930         |               | 0.959                | 0.041           | Robust        |
| Voting age                                | -3.606     | 2.383         |               | 0.817                | 0.183           |               |

Note: Results from 22,100 regressions including each of the 53 questionable variables. Core five variable results from 1,171,092 models.

**Table A10. Registered voters with random effects without lagged DV—complete results**

| <i>Variable</i>                           | <i>Leamer</i> |           | <i>Sala-i-Martin</i> |                 |                 |               |
|-------------------------------------------|---------------|-----------|----------------------|-----------------|-----------------|---------------|
|                                           | <i>LB</i>     | <i>UB</i> | <i>Robust</i>        | <i>CDF&lt;0</i> | <i>CDF&gt;0</i> | <i>Robust</i> |
| # elections held                          | -12.114       | 4.188     |                      | 0.756           | 0.244           |               |
| # seats in legislature (ln)               | -0.511        | 9.802     |                      | 0.047           | 0.953           | Robust        |
| 2nd election                              | -13.229       | 8.679     |                      | 0.485           | 0.515           |               |
| 3rd election                              | -2.299        | 6.522     |                      | 0.148           | 0.852           |               |
| 3rd & 4th election                        | -3.121        | 4.842     |                      | 0.283           | 0.717           |               |
| 4th election                              | -8.512        | 6.588     |                      | 0.386           | 0.614           |               |
| 5th & 6th election                        | -2.644        | 1.986     |                      | 0.7101          | 0.290           |               |
| 7th & 8th                                 | -3.753        | 2.258     |                      | 0.810           | 0.190           |               |
| 1945-1994 time period                     | 0.423         | 6.855     | Robust               | 0.001           | 0.999           | Robust        |
| Africa                                    | -18.114       | 10.600    |                      | 0.689           | 0.311           |               |
| Asia                                      | -6.888        | 14.071    |                      | 0.285           | 0.715           |               |
| Ban                                       | -1.561        | 6.684     |                      | 0.126           | 0.874           |               |
| Boycott                                   | -11.708       | 3.469     |                      | 0.856           | 0.144           |               |
| Closeness/competitiveness                 | -3.906        | 0.076     |                      | 0.992           | 0.008           | Robust        |
| Compulsory voting                         | 0.565         | 21.050    | Robust               | 0.003           | 0.997           | Robust        |
| Concurrent election                       | -1.570        | 19.764    |                      | 0.000           | 1.000           | Robust        |
| Cumulative executive responsiveness       | -7.008        | 6.357     |                      | 0.279           | 0.721           |               |
| District Magnitude                        | -1.599        | 2.748     |                      | 50.000          | -49.000         |               |
| Eastern Europe                            | -16.699       | 1.268     |                      | 0.899           | 0.101           |               |
| Economic globalization                    | -7.559        | -1.981    | Robust               | 1.000           | 0.000           | Robust        |
| Eff. # political parties (Golder)         | -2.957        | 2.586     |                      | 0.502           | 0.498           |               |
| Eff. # political parties Squared (Golder) | -10.249       | 11.836    |                      | 0.344           | 0.656           |               |
| Ethnic fractionalization                  | -9.245        | -1.544    | Robust               | 0.997           | 0.003           | Robust        |
| Federal system                            | -3.507        | 6.191     |                      | 0.229           | 0.771           |               |
| Female suffrage                           | -38.252       | 27.653    |                      | 0.822           | 0.178           |               |
| GINI index                                | -30.081       | 21.857    |                      | 0.917           | 0.083           |               |
| GNI per capita growth                     | -24.854       | 12.302    |                      | 0.726           | 0.274           |               |
| GNI per capita, ln (const. 2010 USD)      | -26.665       | 12.896    |                      | 0.710           | 0.290           |               |
| Government fractionalization              | -1.234        | 0.711     |                      | 0.673           | 0.327           |               |
| Harassment                                | -3.179        | 2.801     |                      | 0.446           | 0.554           |               |
| Human development index                   | -10.913       | 4.501     |                      | 0.857           | 0.143           |               |
| Inflation                                 | 0.380         | 2.569     | Robust               | 0.008           | 0.992           | Robust        |
| Islamic majority nation                   | -17.031       | -3.188    | Robust               | 0.992           | 0.008           | Robust        |
| Latin America & Caribbean                 | -18.037       | -4.514    | Robust               | 0.999           | 0.001           | Robust        |
| Life expectancy (ave.)                    | -13.462       | 6.918     |                      | 0.794           | 0.206           |               |
| Linguistic fractionalization              | -6.024        | 2.413     |                      | 0.821           | 0.179           |               |
| Majoritarian system                       | -9.910        | 10.688    |                      | 0.307           | 0.693           |               |
| Majority status of gov't                  | -1.862        | 2.313     |                      | 0.419           | 0.581           |               |
| Mixed/Semi-presidential system            | -12.836       | 8.998     |                      | 0.772           | 0.228           |               |
| Norway                                    | 0.246         | 17.226    | Robust               | 0.011           | 0.989           | Robust        |
| New Zealand                               | -1.134        | 30.924    |                      | 0.045           | 0.955           |               |
| Oceania                                   | 7.966         | 27.436    | Robust               | 0.000           | 1.000           | Robust        |
| OECD member                               | -5.561        | 12.431    |                      | 0.155           | 0.845           |               |
| Plurality system                          | -11.467       | 6.326     |                      | 0.615           | 0.385           |               |
| Polity2                                   | -16.499       | 11.511    |                      | 0.892           | 0.108           |               |
| Population density                        | -4.163        | 1.689     |                      | 0.825           | 0.175           |               |
| Population, ln                            | -12.619       | 2.048     |                      | 0.981           | 0.019           | Robust        |
| Proportional representation               | -2.820        | 9.741     |                      | 0.097           | 0.903           |               |
| Quality of democracy                      | -2.941        | 2.284     |                      | 0.511           | 0.489           |               |
| Radios, per capita, ln                    | -7.084        | 5.442     |                      | 0.637           | 0.363           |               |
| Religious fractionalization               | -2.003        | 7.126     |                      | 0.153           | 0.847           |               |
| Revenue decentralization                  | -4.937        | 4.412     |                      | 0.296           | 0.704           |               |
| Share age 30-69 of VAP                    | -0.467        | 0.226     |                      | 0.750           | 0.250           |               |
| South America                             | -11.580       | 6.422     |                      | 0.815           | 0.185           |               |
| Spending decentralization                 | -0.728        | 6.836     |                      | 0.071           | 0.929           |               |
| Suffrage                                  | -5.942        | 2.261     |                      | 0.823           | 0.177           |               |
| Sweden                                    | 4.569         | 25.476    | Robust               | 0.000           | 1.000           | Robust        |
| Switzerland                               | -37.462       | -15.905   | Robust               | 1.000           | 0.000           | Robust        |
| Time since previous election              | -1.205        | 1.239     |                      | 0.454           | 0.546           |               |
| Time trend                                | -9.674        | -1.245    | Robust               | 0.995           | 0.005           | Robust        |
| Unemployment                              | -4.103        | 0.925     |                      | 0.855           | 0.145           |               |
| Unicameralism                             | -9.712        | 7.293     |                      | 0.698           | 0.303           |               |

|                            |         |        |        |       |       |        |
|----------------------------|---------|--------|--------|-------|-------|--------|
| Union density              | 0.008   | 0.157  | Robust | 0.022 | 0.978 | Robust |
| Unionization               | -0.069  | 0.112  |        | 0.273 | 0.727 |        |
| Urban population (% total) | -8.322  | 3.684  |        | 0.835 | 0.165 |        |
| USA                        | -10.385 | 16.288 |        | 0.374 | 0.626 |        |
| Violence                   | -4.857  | 2.991  |        | 0.748 | 0.252 |        |
| Voting age                 | -1.737  | 1.193  |        | 0.779 | 0.221 |        |
| West                       | -3.898  | 34.226 |        | 0.074 | 0.926 |        |

---

Note: Results from 9,182 regressions including each of the 65 questionable variables. Core five variable results from 611,080 models.

**Table A11. Registered voters with robust standard errors and lagged DV—complete results**

| Variable                                  | LB      | Leamer |        | Sala-i-Martin |       |        |
|-------------------------------------------|---------|--------|--------|---------------|-------|--------|
|                                           |         | UB     | Robust | CDF<0         | CDF>0 | Robust |
| # elections held                          | -2.304  | 2.685  |        | 0.464         | 0.536 |        |
| # seats in legislature (ln)               | -1.248  | 2.098  |        | 0.160         | 0.840 |        |
| 1919-1944 time period                     | 0.056   | 2.633  | Robust | 0.040         | 0.960 | Robust |
| Africa dummy                              | -2.953  | 5.751  |        | 0.191         | 0.809 |        |
| Asia dummy                                | -0.574  | 5.368  |        | 0.055         | 0.945 |        |
| Ban                                       | -4.463  | 1.716  |        | 0.796         | 0.204 |        |
| Boycott                                   | -11.718 | 1.231  |        | 0.960         | 0.040 | Robust |
| Closeness/competitiveness                 | -3.555  | 0.610  |        | 0.890         | 0.110 |        |
| Compulsory voting                         | -0.015  | 7.809  |        | 0.000         | 1.000 | Robust |
| Concurrent election                       | -6.690  | 19.223 |        | 0.000         | 1.000 | Robust |
| Cumulative executive responsiveness       | -1.602  | 1.496  |        | 0.578         | 0.422 |        |
| District Magnitude                        | -0.323  | 0.675  |        | 0.177         | 0.823 |        |
| E. Europe dummy                           | -4.889  | -1.160 | Robust | 0.998         | 0.002 | Robust |
| Economic globalization                    | -1.903  | 0.835  |        | 0.879         | 0.121 |        |
| Eff. # political parties (Golder)         | -2.857  | 2.362  |        | 0.386         | 0.614 |        |
| Eff. # political parties Squared (Golder) | -11.202 | 10.456 |        | 0.304         | 0.696 |        |
| Ethnic fractionalization                  | -2.645  | -0.192 | Robust | 0.000         | 1.000 | Robust |
| Federal system                            | -1.239  | 2.167  |        | 0.195         | 0.805 |        |
| Female suffrage                           | -24.174 | 22.108 |        | 0.784         | 0.216 |        |
| Fifth or sixth election                   | -0.441  | 3.812  |        | 0.040         | 0.960 | Robust |
| Fourth election                           | -8.254  | 5.576  |        | 0.478         | 0.522 |        |
| GINI index                                | -7.035  | 3.445  |        | 0.931         | 0.069 |        |
| GNI per capita growth                     | -2.328  | 0.327  |        | 0.998         | 0.002 | Robust |
| GNI per capita, ln (const. 2010 USD)      | -7.849  | 7.552  |        | 0.248         | 0.752 |        |
| Government fractionalization              | -1.244  | 1.916  |        | 0.173         | 0.827 |        |
| Harassment                                | -2.640  | 3.706  |        | 0.461         | 0.539 |        |
| Human Development Index                   | -4.127  | 5.586  |        | 0.318         | 0.682 |        |
| Inflation                                 | -0.244  | 1.807  |        | 0.009         | 0.991 | Robust |
| Islam majority nation                     | -1.289  | 2.795  |        | 0.183         | 0.817 |        |
| Latin America & Caribbean dummy           | -6.332  | -1.156 | Robust | 0.997         | 0.003 | Robust |
| Life expectancy (ave.)                    | -4.517  | 2.306  |        | 0.818         | 0.182 |        |
| Linguistic fractionalization              | -1.001  | 2.064  |        | 0.153         | 0.847 |        |
| Majoritarian system                       | -0.547  | 4.671  |        | 0.113         | 0.887 |        |
| Majority status of gov't                  | -2.797  | 2.959  |        | 0.697         | 0.303 |        |
| Mixed/Semi-presidential system            | -5.523  | 2.472  |        | 0.814         | 0.186 |        |
| New Zealand dummy                         | -1.683  | 4.260  |        | 0.134         | 0.866 |        |
| Norway dummy                              | -1.123  | 3.545  |        | 0.099         | 0.901 |        |
| Oceania dummy                             | 1.779   | 8.367  | Robust | 0.001         | 0.999 | Robust |
| OECD member                               | -0.812  | 4.562  |        | 0.106         | 0.894 |        |
| Plurality system                          | -4.022  | 1.389  |        | 0.904         | 0.096 |        |
| Polity2                                   | -4.143  | 7.475  |        | 0.119         | 0.881 |        |
| Population density                        | -1.098  | 0.813  |        | 0.763         | 0.237 |        |
| Population, ln                            | -2.730  | 1.392  |        | 0.808         | 0.192 |        |
| Previous turnout                          | 0.543   | 0.884  | Robust | 0.001         | 0.999 | Robust |
| Proportional representation               | -1.110  | 3.364  |        | 0.083         | 0.917 |        |
| Quality of democracy                      | 0.184   | 4.431  | Robust | 0.024         | 0.976 | Robust |
| Radios, per capita, ln                    | -3.561  | 2.685  |        | 0.749         | 0.251 |        |
| Religious fractionalization               | -0.424  | 1.463  |        | 0.086         | 0.914 |        |
| Revenue decentralization                  | -0.708  | 2.464  |        | 0.053         | 0.947 |        |
| Second election                           | -20.045 | -3.643 | Robust | 0.999         | 0.001 | Robust |
| Seventh or eighth election                | -4.085  | 5.137  |        | 0.195         | 0.805 |        |
| Share age 30-69 of VAP                    | -0.340  | 0.343  |        | 0.374         | 0.626 |        |
| South America dummy                       | -5.219  | 0.491  |        | 0.914         | 0.086 |        |
| Spending decentralization                 | -0.439  | 3.174  |        | 0.027         | 0.973 | Robust |
| Suffrage                                  | -1.697  | 2.448  |        | 0.308         | 0.692 |        |
| Sweden dummy                              | 1.986   | 5.946  | Robust | 0.000         | 1.000 | Robust |
| Switzerland dummy                         | -17.390 | -1.979 | Robust | 1.000         | 0.000 | Robust |
| Third election                            | -4.015  | 10.020 |        | 0.079         | 0.921 |        |
| Third or fourth election                  | -1.906  | 3.483  |        | 0.111         | 0.889 |        |
| Time since previous election              | -1.874  | 1.438  |        | 0.681         | 0.319 |        |
| Time trend                                | -4.139  | 0.143  |        | 0.988         | 0.012 | Robust |
| Unemployment                              | -2.004  | 0.561  |        | 0.832         | 0.168 |        |

|                            |        |       |        |       |       |        |
|----------------------------|--------|-------|--------|-------|-------|--------|
| Unicameralism              | -1.678 | 1.449 |        | 0.547 | 0.453 |        |
| Union density              | 0.022  | 0.113 | Robust | 0.011 | 0.989 | Robust |
| Unionization               | -0.005 | 0.086 |        | 0.045 | 0.955 | Robust |
| Urban population (% total) | -1.324 | 2.624 |        | 0.202 | 0.798 |        |
| USA dummy                  | -5.395 | 1.704 |        | 0.922 | 0.078 |        |
| Violence                   | -3.344 | 1.683 |        | 0.884 | 0.116 |        |
| Voting age                 | -0.981 | 1.448 |        | 0.175 | 0.825 |        |
| West dummy                 | -0.716 | 8.562 |        | 0.115 | 0.885 |        |

Note: Results from 2,432,871 regressions including each of the 65 questionable variables. Core five variable results from 2,432,871 models. Models with a variable with a VIF score over 7 excluded.

**Table A12. Registered voters with robust standard errors without lagged DV—complete results**

| Variable                                  | LB      | Leamer  |        | Sala-i-Martin |       |        |
|-------------------------------------------|---------|---------|--------|---------------|-------|--------|
|                                           |         | UB      | Robust | CDF<0         | CDF>0 | Robust |
| # elections held                          | -7.865  | 6.518   |        | 0.900         | 0.100 |        |
| # seats in legislature (ln)               | -2.408  | 6.518   |        | 0.129         | 0.871 |        |
| 1919-1944 time period                     | 2.254   | 9.256   | Robust | 0.011         | 0.989 | Robust |
| Africa dummy                              | -11.015 | 12.321  |        | 0.361         | 0.639 |        |
| Asia dummy                                | -3.478  | 13.419  |        | 0.133         | 0.867 |        |
| Ban                                       | -8.182  | 6.786   |        | 0.580         | 0.420 |        |
| Boycott                                   | -24.927 | 3.222   |        | 0.919         | 0.081 |        |
| Closeness/competitiveness                 | -7.239  | 4.194   |        | 0.763         | 0.237 |        |
| Compulsory voting                         | 8.533   | 17.687  | Robust | 0.000         | 1.000 | Robust |
| Concurrent election                       | -4.552  | 10.815  |        | 0.144         | 0.856 |        |
| Cumulative executive responsiveness       | -3.699  | 5.071   |        | 0.387         | 0.613 |        |
| District Magnitude                        | -0.054  | 2.012   |        | 0.004         | 0.996 | Robust |
| E. Europe dummy                           | -12.513 | 2.819   |        | 0.868         | 0.132 |        |
| Economic globalization                    | -5.001  | 1.022   |        | 0.896         | 0.104 |        |
| Eff. # political parties (Golder)         | -5.169  | 5.338   |        | 0.278         | 0.722 |        |
| Eff. # political parties Squared (Golder) | -20.332 | 21.285  |        | 0.264         | 0.736 |        |
| Ethnic fractionalization                  | -7.267  | -2.131  | Robust | 0.004         | 0.996 | Robust |
| Federal system                            | -0.577  | 5.938   |        | 0.080         | 0.920 |        |
| Female suffrage                           | -61.142 | 57.341  |        | 0.777         | 0.223 |        |
| Fifth or sixth election                   | -4.514  | 4.083   |        | 0.497         | 0.503 |        |
| Fourth election                           | -6.968  | 7.914   |        | 0.292         | 0.708 |        |
| GINI index                                | -9.596  | 0.598   |        | 0.957         | 0.043 | Robust |
| GNI per capita growth                     | -3.247  | 1.241   |        | 0.865         | 0.135 |        |
| GNI per capita, ln (const. 2010 USD)      | -17.282 | 18.861  |        | 0.245         | 0.755 |        |
| Government fractionalization              | -2.305  | 2.191   |        | 0.362         | 0.638 |        |
| Harassment                                | -1.508  | 4.577   |        | 0.148         | 0.852 |        |
| Human Development Index                   | -7.858  | 17.698  |        | 0.189         | 0.811 |        |
| Inflation                                 | 0.575   | 3.961   | Robust | 0.002         | 0.998 | Robust |
| Islam majority nation                     | -10.133 | 0.744   |        | 0.968         | 0.032 | Robust |
| Latin America & Caribbean dummy           | -15.763 | -6.497  | Robust | 1.000         | 0.000 | Robust |
| Life expectancy (ave.)                    | -14.017 | 4.020   |        | 0.835         | 0.165 |        |
| Linguistic fractionalization              | -2.801  | 4.606   |        | 0.241         | 0.759 |        |
| Majoritarian system                       | -3.139  | 10.887  |        | 0.140         | 0.860 |        |
| Majority status of gov't                  | -3.985  | 6.869   |        | 0.279         | 0.721 |        |
| Mixed/Semi-presidential system            | -11.289 | 6.885   |        | 0.775         | 0.225 |        |
| New Zealand dummy                         | -0.522  | 17.538  |        | 0.068         | 0.932 |        |
| Norway dummy                              | -2.711  | 8.231   |        | 0.138         | 0.862 |        |
| Oceania dummy                             | 8.931   | 20.704  | Robust | 0.001         | 0.999 | Robust |
| OECD member                               | 0.197   | 12.291  | Robust | 0.053         | 0.947 |        |
| Plurality system                          | -10.801 | 6.629   |        | 0.680         | 0.320 |        |
| Polity2                                   | -14.625 | 21.209  |        | 0.192         | 0.808 |        |
| Population density                        | -2.403  | 1.828   |        | 0.656         | 0.344 |        |
| Population, ln                            | -7.945  | 1.533   |        | 0.974         | 0.026 | Robust |
| Proportional representation               | -1.875  | 7.729   |        | 0.093         | 0.907 |        |
| Quality of democracy                      | 0.705   | 11.039  | Robust | 0.028         | 0.972 | Robust |
| Radios, per capita, ln                    | -4.799  | 7.057   |        | 0.370         | 0.630 |        |
| Religious fractionalization               | -0.347  | 4.189   |        | 0.055         | 0.945 |        |
| Revenue decentralization                  | -1.620  | 4.846   |        | 0.055         | 0.945 |        |
| Second election                           | -18.577 | 3.725   |        | 0.879         | 0.121 |        |
| Seventh or eighth election                | -2.582  | 8.641   |        | 0.085         | 0.915 |        |
| Share age 30-69 of VAP                    | -0.760  | 0.063   |        | 0.970         | 0.030 | Robust |
| South America dummy                       | -14.239 | 1.474   |        | 0.908         | 0.092 |        |
| Spending decentralization                 | -1.487  | 6.398   |        | 0.908         | 0.092 | Robust |
| Suffrage                                  | -3.519  | 5.241   |        | 0.284         | 0.716 |        |
| Sweden dummy                              | 6.763   | 17.778  | Robust | 0.000         | 1.000 | Robust |
| Switzerland dummy                         | -40.518 | -24.791 | Robust | 1.000         | 0.000 | Robust |
| Third election                            | -6.393  | 4.806   |        | 0.717         | 0.283 |        |
| Third or fourth election                  | -4.365  | 4.535   |        | 0.402         | 0.598 |        |
| Time since previous election              | -2.290  | 3.687   |        | 0.187         | 0.813 |        |
| Time trend                                | -10.648 | -2.727  | Robust | 0.982         | 0.018 | Robust |
| Unemployment                              | -3.838  | 0.480   |        | 0.918         | 0.082 |        |
| Unicameralism                             | -3.758  | 4.648   |        | 0.318         | 0.682 |        |



|                            |         |        |        |       |       |        |
|----------------------------|---------|--------|--------|-------|-------|--------|
| Union density              | 0.031   | 0.307  | Robust | 0.002 | 0.998 | Robust |
| Unionization               | 0.004   | 0.192  | Robust | 0.018 | 0.982 | Robust |
| Urban population (% total) | -1.479  | 7.496  |        | 0.054 | 0.946 |        |
| USA dummy                  | -13.820 | 0.027  |        | 0.944 | 0.056 |        |
| Violence                   | -6.015  | 2.172  |        | 0.896 | 0.104 |        |
| Voting age                 | -2.184  | 2.499  |        | 0.378 | 0.622 |        |
| West dummy                 | 1.381   | 20.995 | Robust | 0.052 | 0.948 |        |

Note: Results from 2,432,871 regressions including each of the 65 questionable variables. Core five variable results from 2,432,871 models. Models with a variable with a VIF score over 7 excluded.

**Table A13. Voting aged population with robust standard errors and lagged DV—complete results**

| Variable                                  | Leamer  |        |        | Sala-i-Martin |       |        |
|-------------------------------------------|---------|--------|--------|---------------|-------|--------|
|                                           | LB      | UB     | Robust | CDF<0         | CDF>0 | Robust |
| # elections held                          | -1.892  | 2.014  |        | 0.624         | 0.376 |        |
| # seats in legislature (ln)               | -0.038  | 2.315  |        | 0.043         | 0.957 | Robust |
| 1919-1944 time period                     | -0.198  | 2.315  |        | 0.066         | 0.934 |        |
| Africa dummy                              | -4.381  | 2.938  |        | 0.751         | 0.249 |        |
| Asia dummy                                | -0.338  | 6.018  |        | 0.020         | 0.980 | Robust |
| Ban                                       | -5.757  | 1.001  |        | 0.927         | 0.073 |        |
| Boycott                                   | -11.977 | 1.873  |        | 0.811         | 0.189 |        |
| Closeness/competitiveness                 | -3.237  | 0.454  |        | 0.914         | 0.086 |        |
| Compulsory voting                         | 0.587   | 5.564  | Robust | 0.002         | 0.998 | Robust |
| Concurrent election                       | -6.684  | 17.354 |        | 0.000         | 1.000 | Robust |
| Cumulative executive responsiveness       | -0.790  | 17.354 |        | 0.000         | 1.000 | Robust |
| District Magnitude                        | -0.330  | 0.583  |        | 0.251         | 0.749 |        |
| E. Europe dummy                           | -2.860  | -0.453 | Robust | 0.990         | 0.010 | Robust |
| Economic globalization                    | -1.900  | 0.149  |        | 0.955         | 0.045 | Robust |
| Eff. # political parties (Golder)         | -1.194  | 2.378  |        | 0.136         | 0.864 |        |
| Eff. # political parties Squared (Golder) | -4.556  | 10.630 |        | 0.132         | 0.868 |        |
| Ethnic fractionalization                  | -2.517  | -0.506 | Robust | 1.000         | 0.000 | Robust |
| Federal system                            | -2.064  | 1.829  |        | 0.430         | 0.570 |        |
| Female suffrage                           | -25.847 | 15.178 |        | 0.985         | 0.146 | Robust |
| Fifth or sixth election                   | 0.313   | 4.657  | Robust | 0.039         | 0.961 | Robust |
| Fourth election                           | -8.053  | 4.155  |        | 0.885         | 0.115 |        |
| GINI index                                | -2.980  | 1.586  |        | 0.894         | 0.106 |        |
| GNI per capita growth                     | -1.620  | 0.655  |        | 0.885         | 0.115 |        |
| GNI per capita, ln (const. 2010 USD)      | -7.527  | 6.306  |        | 0.296         | 0.704 |        |
| Government fractionalization              | -1.043  | 1.861  |        | 0.159         | 0.841 |        |
| Harassment                                | -2.989  | 4.688  |        | 0.392         | 0.608 |        |
| Human Development Index                   | -3.875  | 7.057  |        | 0.265         | 0.735 |        |
| Inflation                                 | 0.062   | 1.685  | Robust | 0.007         | 0.993 | Robust |
| Islam majority nation                     | -1.773  | 2.112  |        | 0.354         | 0.646 |        |
| Latin America & Caribbean dummy           | -4.220  | 0.474  |        | 0.946         | 0.054 |        |
| Life expectancy (ave.)                    | -3.238  | 4.665  |        | 0.457         | 0.543 |        |
| Linguistic fractionalization              | -1.284  | 1.507  |        | 0.297         | 0.703 |        |
| Majoritarian system                       | -2.033  | 4.551  |        | 0.149         | 0.851 |        |
| Majority status of gov't                  | -2.563  | 0.699  |        | 0.884         | 0.116 |        |
| Mixed/Semi-presidential system            | -5.044  | 3.921  |        | 0.753         | 0.247 |        |
| New Zealand dummy                         | -3.642  | 5.052  |        | 0.242         | 0.758 |        |
| Norway dummy                              | -0.254  | 4.205  |        | 0.004         | 0.996 | Robust |
| Oceania dummy                             | -0.213  | 5.466  |        | 0.079         | 0.921 |        |
| OECD member                               | -2.148  | 3.242  |        | 0.228         | 0.772 |        |
| Plurality system                          | -3.651  | 0.885  |        | 0.962         | 0.038 | Robust |
| Polity2                                   | -5.125  | 5.672  |        | 0.611         | 0.389 |        |
| Population density                        | -0.537  | 1.368  |        | 0.153         | 0.847 |        |
| Population, ln                            | -2.803  | 1.323  |        | 0.883         | 0.117 |        |
| Previous turnout                          | 0.633   | 0.899  | Robust | 0.000         | 1.000 | Robust |
| Proportional representation               | -0.606  | 3.564  |        | 0.062         | 0.938 |        |
| Quality of democracy                      | -1.146  | 2.680  |        | 0.125         | 0.875 |        |
| Radios, per capita, ln                    | -5.324  | 0.725  |        | 0.953         | 0.047 | Robust |
| Religious fractionalization               | -0.808  | 0.990  |        | 0.310         | 0.690 |        |
| Revenue decentralization                  | -0.852  | 2.231  |        | 0.068         | 0.932 |        |
| Second election                           | -24.559 | -2.840 | Robust | 1.000         | 0.000 | Robust |
| Seventh or eighth election                | -3.210  | 3.550  |        | 0.541         | 0.459 |        |
| Share age 30-69 of VAP                    | 0.048   | 0.466  | Robust | 0.026         | 0.974 | Robust |
| South America dummy                       | -3.453  | 0.203  |        | 0.947         | 0.053 |        |
| Spending decentralization                 | -0.600  | 2.478  |        | 0.069         | 0.931 |        |
| Suffrage                                  | -25.847 | 15.178 |        | 0.985         | 0.015 |        |

|                              |         |        |        |       |       |        |
|------------------------------|---------|--------|--------|-------|-------|--------|
| Sweden dummy                 | 0.569   | 5.631  | Robust | 0.023 | 0.977 | Robust |
| Switzerland dummy            | -12.135 | -5.353 | Robust | 0.997 | 0.003 | Robust |
| Third election               | -1.220  | 11.370 |        | 0.048 | 0.952 | Robust |
| Third or fourth election     | -1.994  | 4.670  |        | 0.139 | 0.861 |        |
| Time since previous election | -1.017  | 1.189  |        | 0.287 | 0.713 |        |
| Time trend                   | -3.201  | -0.032 | Robust | 0.962 | 0.038 | Robust |
| Unemployment                 | -1.366  | 0.666  |        | 0.797 | 0.203 |        |
| Unicameralism                | -0.803  | 2.550  |        | 0.112 | 0.888 |        |
| Union density                | 0.004   | 0.112  | Robust | 0.036 | 0.964 | Robust |
| Unionization                 | -0.046  | 0.066  |        | 0.347 | 0.653 |        |
| Urban population (% total)   | -2.076  | 2.763  |        | 0.513 | 0.487 |        |
| USA dummy                    | -8.774  | -2.316 | Robust | 0.000 | 1.000 | Robust |
| Violence                     | -3.293  | 0.101  |        | 0.993 | 0.007 | Robust |
| Voting age                   | -1.008  | 1.534  |        | 0.216 | 0.784 |        |
| West dummy                   | -2.745  | 5.551  |        | 0.137 | 0.863 |        |

Note: Results from 2,432,871 regressions including each of the 65 questionable variables. Core five variable results from 2,432,871 models. Models with a variable with a VIF score over 7 excluded.

**Table A14. Registered voters with robust standard errors and lagged DV in all states—complete results**

| Variable                                  | LB      | Leamer |        | Sala-i-Martin |       |        |
|-------------------------------------------|---------|--------|--------|---------------|-------|--------|
|                                           |         | UB     | Robust | CDF<0         | CDF>0 | Robust |
| # elections held                          | -2.847  | 2.026  |        | 0.808         | 0.192 |        |
| # seats in legislature (ln)               | -1.379  | 2.026  |        | 0.193         | 0.807 |        |
| 1945-1994 time period                     | -0.980  | 2.387  |        | 0.143         | 0.857 |        |
| Africa dummy                              | -1.701  | 6.958  |        | 0.081         | 0.919 |        |
| Asia dummy                                | -0.935  | 5.232  |        | 0.048         | 0.952 | Robust |
| Ban                                       | -5.509  | 2.162  |        | 0.787         | 0.213 |        |
| Boycott                                   | -8.848  | 1.453  |        | 0.908         | 0.092 |        |
| Closeness/competitiveness                 | -2.877  | 0.695  |        | 0.882         | 0.118 |        |
| Compulsory voting                         | -0.180  | 7.657  |        | 0.000         | 1.000 | Robust |
| Concurrent election                       | -6.909  | 18.856 |        | 0.000         | 1.000 | Robust |
| Cumulative executive responsiveness       | -1.687  | 1.679  |        | 0.511         | 0.489 |        |
| District Magnitude                        | -0.450  | 0.828  |        | 0.254         | 0.746 |        |
| E. Europe dummy                           | -4.709  | -1.171 | Robust | 0.998         | 0.002 | Robust |
| Economic globalization                    | -1.688  | 0.773  |        | 0.898         | 0.102 |        |
| Eff. # political parties (Golder)         | -2.931  | 2.112  |        | 0.676         | 0.324 |        |
| Eff. # political parties Squared (Golder) | -11.309 | 9.983  |        | 0.366         | 0.634 |        |
| Ethnic fractionalization                  | -2.446  | -0.190 | Robust | 1.000         | 0.000 | Robust |
| Federal system                            | -1.194  | 2.686  |        | 0.176         | 0.824 |        |
| Female suffrage                           | -22.023 | 21.506 |        | 0.749         | 0.251 |        |
| Fifth or sixth election                   | -0.219  | 4.087  |        | 0.030         | 0.970 | Robust |
| Fourth election                           | -8.122  | 5.885  |        | 0.401         | 0.599 |        |
| GINI index                                | -7.014  | 3.090  |        | 0.947         | 0.053 |        |
| GNI per capita growth                     | -2.250  | 0.649  |        | 0.978         | 0.022 | Robust |
| GNI per capita, ln (const. 2010 USD)      | -7.745  | 7.638  |        | 0.231         | 0.769 |        |
| Government fractionalization              | -1.255  | 1.839  |        | 0.188         | 0.812 |        |
| Harassment                                | -4.378  | 1.019  |        | 0.892         | 0.108 |        |
| Human Development Index                   | -4.095  | 5.371  |        | 0.318         | 0.682 |        |
| Inflation                                 | -0.015  | 1.816  |        | 0.003         | 0.997 | Robust |
| Islam majority nation                     | -2.098  | 5.058  |        | 0.145         | 0.855 |        |
| Latin America & Caribbean dummy           | -6.083  | -0.986 | Robust | 0.997         | 0.003 | Robust |
| Life expectancy (ave.)                    | -3.772  | 2.513  |        | 0.736         | 0.264 |        |
| Linguistic fractionalization              | -0.972  | 1.946  |        | 0.141         | 0.859 |        |
| Majoritarian system                       | -0.425  | 4.771  |        | 0.09382       | 0.906 |        |
| Majority status of gov't                  | -2.101  | 3.114  |        | 0.339         | 0.661 |        |
| Mixed/Semi-presidential system            | -5.669  | 2.375  |        | 0.831         | 0.169 |        |
| New Zealand dummy                         | -1.946  | 3.413  |        | 0.174         | 0.826 |        |
| Norway dummy                              | -1.192  | 3.482  |        | 0.118         | 0.882 |        |
| Oceania dummy                             | 1.201   | 7.946  | Robust | 0.005         | 0.995 | Robust |
| OECD member                               | -1.058  | 4.196  |        | 0.120         | 0.880 |        |
| Plurality system                          | -3.632  | 2.150  |        | 0.688         | 0.312 |        |
| Polity2                                   | -5.404  | 6.523  |        | 0.643         | 0.357 |        |
| Population density                        | -1.344  | 0.846  |        | 0.834         | 0.166 |        |
| Population, ln                            | -2.692  | 1.145  |        | 0.879         | 0.121 |        |
| Previous turnout                          | 0.541   | 0.881  | Robust | 0.001         | 0.999 | Robust |
| Proportional representation               | -1.578  | 2.972  |        | 0.190         | 0.810 |        |
| Quality of democracy                      | 0.152   | 4.365  | Robust | 0.022         | 0.978 | Robust |
| Radios, per capita, ln                    | -2.397  | 3.234  |        | 0.285         | 0.715 |        |
| Religious fractionalization               | -0.745  | 1.178  |        | 0.232         | 0.768 |        |
| Revenue decentralization                  | -0.338  | 3.044  |        | 0.046         | 0.954 | Robust |
| Second election                           | -20.244 | -3.272 | Robust | 1.000         | 0.000 | Robust |
| Seventh or eighth election                | -3.868  | 6.373  |        | 0.188         | 0.812 |        |
| Share age 30-69 of VAP                    | -0.346  | 0.318  |        | 0.466         | 0.534 |        |
| South America dummy                       | -3.534  | 2.249  |        | 0.795         | 0.205 |        |
| Spending decentralization                 | -0.500  | 3.481  |        | 0.043         | 0.957 | Robust |
| Suffrage                                  | -1.580  | 2.508  |        | 0.27417       | 0.726 |        |
| Sweden dummy                              | 1.764   | 6.260  | Robust | 0.000         | 1.000 | Robust |
| Switzerland dummy                         | -17.155 | -2.089 | Robust | 1.000         | 0.000 | Robust |
| Third election                            | -2.242  | 3.128  |        | 0.237         | 0.763 |        |
| Third or fourth election                  | -5.867  | 10.048 |        | 0.417         | 0.583 |        |
| Time since previous election              | -1.808  | 1.413  |        | 0.738         | 0.262 |        |
| Time trend                                | -3.777  | 0.676  |        | 0.987         | 0.013 | Robust |
| Unemployment                              | -1.948  | 0.393  |        | 0.887         | 0.113 |        |

|                            |        |       |        |       |       |        |
|----------------------------|--------|-------|--------|-------|-------|--------|
| Unicameralism              | -1.665 | 1.380 |        | 0.573 | 0.427 |        |
| Union density              | 0.022  | 0.113 | Robust | 0.011 | 0.989 | Robust |
| Unionization               | -0.005 | 0.086 |        | 0.045 | 0.955 | Robust |
| Urban population (% total) | -0.398 | 2.890 |        | 0.048 | 0.952 | Robust |
| USA dummy                  | -5.774 | 1.355 |        | 0.943 | 0.057 |        |
| Violence                   | -3.813 | 0.715 |        | 0.994 | 0.006 | Robust |
| Voting age                 | -1.041 | 1.346 |        | 0.227 | 0.773 |        |
| West dummy                 | -0.746 | 8.128 |        | 0.117 | 0.883 |        |

Note: Results from 41,664 including each of the 65 questionable variables. Core five variable results from 2,446,308 models.

**Table A15. Variables in 9,775 models with compulsory voting**

| <b>Variable</b>              | <b>Frequency</b> | <b>Percentage</b> |
|------------------------------|------------------|-------------------|
| Union density                | 9,430            | 96.5%             |
| HDI index                    | 6,616            | 67.7%             |
| Oceania                      | 1,500            | 15.3%             |
| GINI index                   | 1,385            | 14.2%             |
| Revenue decentralization     | 961              | 9.8%              |
| Executive responsiveness     | 770              | 7.9%              |
| Plurality                    | 753              | 7.7%              |
| Religious fractionalization  | 558              | 5.7%              |
| Suffrage                     | 551              | 5.6%              |
| Unionization                 | 502              | 5.1%              |
| Polity2                      | 500              | 5.1%              |
| Population density           | 492              | 5.0%              |
| Fourth election              | 418              | 4.3%              |
| Ethnic fractionalization     | 412              | 4.2%              |
| Urban population             | 403              | 4.1%              |
| Concurrent elections         | 401              | 4.1%              |
| Third or fourth election     | 388              | 4.0%              |
| Female suffrage              | 350              | 3.6%              |
| Sweden                       | 343              | 3.5%              |
| Inflation                    | 324              | 3.3%              |
| share age 30-69 of VAP       | 321              | 3.3%              |
| USA                          | 318              | 3.3%              |
| Radios pc                    | 317              | 3.2%              |
| South America                | 317              | 3.2%              |
| Asia                         | 310              | 3.2%              |
| Federalism                   | 309              | 3.2%              |
| Unicameral                   | 309              | 3.2%              |
| West                         | 309              | 3.2%              |
| Majoritarian                 | 301              | 3.1%              |
| Mixed system                 | 301              | 3.1%              |
| Time since previous election | 301              | 3.1%              |
| Language fractionalization   | 300              | 3.1%              |
| E. Europe                    | 298              | 3.0%              |
| OECD                         | 297              | 3.0%              |
| New Zealand                  | 297              | 3.0%              |
| Islamic majority nation      | 297              | 3.0%              |
| Latin America                | 297              | 3.0%              |
| Voting age                   | 295              | 3.0%              |
| Africa                       | 291              | 3.0%              |
| Legislative seats            | 291              | 3.0%              |
| Life expectancy              | 290              | 3.0%              |
| Norway                       | 287              | 2.9%              |
| Economic globalization       | 284              | 2.9%              |
| District magnitude           | 283              | 2.9%              |
| Years 1945-1994              | 283              | 2.9%              |
| Ban                          | 282              | 2.9%              |
| Fifth or sixth elections     | 282              | 2.9%              |
| Second election              | 282              | 2.9%              |
| Harassment                   | 281              | 2.9%              |
| Competitive election         | 279              | 2.9%              |
| Third election               | 278              | 2.8%              |
| Number of elections          | 275              | 2.8%              |
| Time trend                   | 275              | 2.8%              |
| Boycott                      | 274              | 2.8%              |
| Violence                     | 273              | 2.8%              |

|                                    |     |      |
|------------------------------------|-----|------|
| Majoritarian status                | 272 | 2.8% |
| Quality of democracy               | 270 | 2.8% |
| Seventh or eighth election         | 259 | 2.6% |
| Switzerland                        | 250 | 2.6% |
| Party fractionalization            | 246 | 2.5% |
| Eff. # political parties (squared) | 237 | 2.4% |
| Eff. # political parties           | 233 | 2.4% |
| Leg. can remove exec.              | 86  | 0.9% |
| GNI growth                         | 59  | 0.6% |
| Unemployment                       | 47  | 0.5% |

---

**Table A16. Extreme bounds analysis results, samples either above or below median income**

|                     | States above median income |             |               |          |              | States below median income |             |               |          |              | Comparable results? |
|---------------------|----------------------------|-------------|---------------|----------|--------------|----------------------------|-------------|---------------|----------|--------------|---------------------|
|                     | Lower bound                | Upper bound | Leamer robust | CDF % <0 | S-i-M Robust | Lower bound                | Upper bound | Leamer robust | CDF % <0 | S-i-M Robust |                     |
| 1919-1944           | 3.739                      | 12.935      | R             | 0.000    | R            | -4.116                     | 3.001       |               | 0.703    |              | no                  |
| Boycott             | -20.86                     | 2.714       |               | 0.874    |              | -15.89                     | -3.200      | R             | 0.998    | R            | no                  |
| Compulsory voting   | 9.218                      | 20.282      | R             | 0.000    | R            | -2.227                     | 13.179      |               | 0.071    |              | no                  |
| Concurrent election | -5.855                     | 8.806       |               | 0.388    |              | 1.178                      | 12.728      | R             | 0.002    | R            | no                  |
| E. Europe           | -17.44                     | -2.775      | R             | 0.988    | R            | -8.382                     | 7.786       |               | 0.576    |              | no                  |
|                     | -6.434                     | -2.747      | R             | 1.000    | R            | -                          | 7.058       |               | 0.878    |              | no                  |
| Ethnic fract.       |                            |             |               |          |              | 12.216                     |             |               |          |              |                     |
| 5th or 6th election | -5.551                     | 3.759       |               | 0.743    |              | -2.738                     | 7.831       |               | 0.166    |              | yes                 |
| GNI p.c. growth     | -2.361                     | 0.311       |               | 0.965    | R            | -2.457                     | 2.563       |               | 0.254    |              | no                  |
| Inflation           | 2.255                      | 6.796       | R             | 0.000    | R            | -1.884                     | 3.949       |               | 0.075    |              | no                  |
| L. America & Car.   | -                          | -0.412      | R             | 0.975    | R            | -                          | 2.222       |               | 0.939    |              | no                  |
| Quality of democ.   | 11.338                     | 6.612       |               | 0.067    |              | 11.212                     | 15.046      | R             | 0.002    | R            | no                  |
| 2nd election        | -0.914                     | 7.467       |               | 0.303    |              | 6.330                      | 10.495      |               | 0.206    |              | yes                 |
| Spending decent.    | -7.148                     | 4.898       |               | 0.037    | R            | -5.105                     | 5.727       |               | 0.615    |              | no                  |

Note: Lower and upper bounds reflect the estimated coefficient and +/- two standard deviations. CDF=cumulative density function. "Leamer robust" signifies that the specified variable is a robust predictor according to Leamer's (1985) criteria outlined in the main paper. "S-i-M robust" signifies that the specified variable is a robust predictor according to Sala-i-Martin's (1997) criteria outlined in the main paper. Last column on right is "yes" if the results for Western and non-Western states are consistent—one or both of the Leamer and Sala-i-Martin robustness results are the same across samples.



**Table A17. Extreme bounds analysis results, samples Western or non-Western states**

|                     | Western states     |                    |                      |                    |                     | Non-Western states |                    |                      |                    |                     | Comparable results? |
|---------------------|--------------------|--------------------|----------------------|--------------------|---------------------|--------------------|--------------------|----------------------|--------------------|---------------------|---------------------|
|                     | <i>Lower bound</i> | <i>Upper bound</i> | <i>Leamer robust</i> | <i>CDF % &lt;0</i> | <i>S-i-M Robust</i> | <i>Lower bound</i> | <i>Upper bound</i> | <i>Leamer robust</i> | <i>CDF % &lt;0</i> | <i>S-i-M Robust</i> |                     |
| 1945-1994 Boycott   | 2.795              | 8.231              | R                    | 0.000              | R                   | 1.580              | 6.295              | R                    | 0.002              | R                   | yes                 |
| Boycott             | -4.266             | 4.668              |                      | 0.541              |                     | -                  | -4.659             | R                    | 0.998              | R                   | no                  |
| Compulsory voting   | 7.652              | 16.485             | R                    | 0.000              | R                   | 24.346             | 20.792             | R                    | 0.00               | R                   | yes                 |
| Concurrent election | 0.850              | 14.280             | R                    | 0.004              | R                   | 7.736              | 8.504              | R                    | 0.038              | R                   | yes                 |
| Ethnic fract.       | -6.706             | -2.889             | R                    | 0.999              | R                   | 0.775              | 0.160              |                      | 0.989              | R                   | yes                 |
| 5th or 6th election | -4.504             | 2.134              |                      | 0.829              |                     | -7.140             | 7.600              |                      | 0.077              |                     | yes                 |
| GNI pc growth       | -2.800             | 1.569              |                      | 0.727              |                     | -2.155             | 1.529              |                      | 0.193              |                     | yes                 |
| Inflation           | 1.631              | 5.127              | R                    | 0.000              | R                   | -0.902             | 3.097              | R                    | 0.002              | R                   | yes                 |
| Quality of democ.   | 0.462              | 10.812             | R                    | 0.004              | R                   | 1.228              | 7.632              | R                    | 0.073              |                     | yes                 |
| 2nd election        | -                  | -4.640             | R                    | 1.000              | R                   | 0.121              | 12.689             | R                    | 0.042              | R                   | yes                 |
| Spending decent.    | 12.059             | 8.940              | R                    | 0.030              | R                   | 0.720              | 3.238              |                      | 0.242              |                     | no                  |
|                     | 0.181              |                    |                      |                    |                     | -1.962             |                    |                      |                    |                     |                     |

Note: Lower and upper bounds reflect the estimated coefficient and +/- two standard deviations. CDF=cumulative density function. "Leamer robust" signifies that the specified variable is a robust predictor according to Leamer's (1985) criteria outlined in the main paper. "S-i-M robust" signifies that the specified variable is a robust predictor according to Sala-i-Martin's (1997) criteria outlined in the main paper. Last column on right is "yes" if the results for Western and non-Western states are consistent—one or both of the Leamer and Sala-i-Martin robustness results are the same across samples.

**Table A18. Extreme bounds analysis results, samples either in old or new democracies**

|                     | Old democracies states |                    |                      |                    |                     | New Democracies states |                    |                      |                    |                     | Comparable results? |
|---------------------|------------------------|--------------------|----------------------|--------------------|---------------------|------------------------|--------------------|----------------------|--------------------|---------------------|---------------------|
|                     | <i>Lower bound</i>     | <i>Upper bound</i> | <i>Leamer robust</i> | <i>CDF % &lt;0</i> | <i>S-i-M Robust</i> | <i>Lower bound</i>     | <i>Upper bound</i> | <i>Leamer robust</i> | <i>CDF % &lt;0</i> | <i>S-i-M Robust</i> |                     |
| 1919-1944           | 3.482                  | 9.978              | R                    | 0.000              | R                   | -1.156                 | 6.815              |                      | 0.091              |                     | no                  |
| Boycott             | -18.153                | 6.220              |                      | 0.931              |                     | -28.898                | -12.223            | R                    | 1.000              | R                   | no                  |
| Compulsory voting   | 8.431                  | 18.206             | R                    | 0.000              | R                   | -5.951                 | 18.663             |                      | 0.101              |                     | no                  |
| Concurrent election | -7.726                 | 9.426              |                      | 0.586              |                     | 1.034                  | 9.763              | R                    | 0.002              | R                   | no                  |
| E. Europe           | -16.216                | -9.422             | R                    | 1.000              | R                   | -14.503                | 5.708              |                      | 0.922              |                     | no                  |
| Ethnic fract.       | -6.933                 | -2.453             | R                    | 1.000              | R                   | -5.893                 | 3.706              |                      | 0.769              |                     | no                  |
| 5th or 6th election | -4.244                 | 4.882              |                      | 0.386              |                     | -12.215                | 22.674             |                      | 0.110              |                     | yes                 |
| GNI p.c. growth     | -2.037                 | 1.183              |                      | 0.704              |                     | -1.319                 | 1.425              |                      | 0.274              |                     | yes                 |
| Inflation           | 1.658                  | 4.130              | R                    | 0.000              | R                   | -1.733                 | 5.506              |                      | 0.068              |                     | no                  |
| L. America & Car.   | -18.314                | -9.051             | R                    | 1.000              | R                   | -11.892                | 8.398              |                      | 0.815              |                     | no                  |
| Quality of democ.   | 0.867                  | 8.689              | R                    | 0.023              | R                   | -2.988                 | 7.447              |                      | 0.088              |                     | no                  |
| Second election     | -7.793                 | 6.311              |                      | 0.450              |                     | -4.622                 | 12.270             |                      | 0.124              |                     | no                  |
| Spending decent.    | -1.630                 | 5.458              |                      | 0.063              |                     | -2.497                 | 10.613             |                      | 0.092              |                     | no                  |

Note: Lower and upper bounds reflect the estimated coefficient and +/- two standard deviations. CDF=cumulative density function. “Leamer robust” signifies that the specified variable is a robust predictor according to Leamer’s (1985) criteria outlined in the main paper. “S-i-M robust” signifies that the specified variable is a robust predictor according to Sala-i-Martin’s (1997) criteria outlined in the main paper. Last column on right is “yes” if the results for “old” (20 or more years as a democracy) and “new” (less than 20 years as a democracy) democracies are consistent—one or both of the Leamer and Sala-i-Martin robustness results are the same across samples.

**Table A19. Extreme Bounds Analysis—comparing temporal results**

|               |         | <b>Time squared models</b>                  |                           |
|---------------|---------|---------------------------------------------|---------------------------|
|               |         | Fragile                                     | Robust                    |
| Fixed effects | Fragile | 9                                           | 0                         |
|               | Robust  | 2<br>(1919-1944; spending decentralization) | 11                        |
|               |         |                                             |                           |
|               |         | <b>Time cubed</b>                           |                           |
|               |         | Fragile                                     | Robust                    |
| Fixed effects | Fragile | 6                                           | 2<br>(boycott; E. Europe) |
|               | Robust  | 1<br>(time trend)                           | 10                        |

Note: counts are out of the 20 variables significant in the main series of models.

**Table A20. Comparing results across levels of economic development**

|                                               |         | <b>Rich (above median income) states</b>                     |                                                                                                                                                   |
|-----------------------------------------------|---------|--------------------------------------------------------------|---------------------------------------------------------------------------------------------------------------------------------------------------|
|                                               |         | Fragile                                                      | Robust                                                                                                                                            |
| <b>Poor<br/>(below<br/>median<br/>income)</b> | Fragile | 4                                                            | 8<br>(compulsory voting, E. Europe, ethnic<br>fract., GNI growth, inflation, Latin<br>America/Caribbean, spending<br>decentralization, 1919-1994) |
|                                               | Robust  | 3<br>(boycott, concurrent election, quality of<br>democracy) | 1                                                                                                                                                 |

**Table A21. Comparing results across Western and non-Western states**

|          | West    |                |                                            |
|----------|---------|----------------|--------------------------------------------|
|          |         | Fragile        | Robust                                     |
| Non-West | Fragile | 4              | 2<br>(GNI p.c., spending decentralization) |
|          | Robust  | 1<br>(boycott) | 8                                          |

**Table A22. Comparing results across established and new democracies**

|                  |         | Old Democracy                       |                                                                                                                                 |
|------------------|---------|-------------------------------------|---------------------------------------------------------------------------------------------------------------------------------|
|                  |         | Fragile                             | Robust                                                                                                                          |
| New<br>Democracy |         |                                     | 8                                                                                                                               |
|                  | Fragile | 6                                   | (compulsory voting, E. Europe, ethnic fract.,<br>inflation, L. America & Carib. population,<br>quality of democracy, 1919-1994) |
|                  | Robust  | 2<br>(boycott, concurrent election) | 0                                                                                                                               |
